# Supplementary material for: Diterpenoids from Isodon rubescens and their nitric oxide production inhibitory activity
Source: Royal Society of Chemistry journal article supplement (doi:10.1039/c9ra08831h), 2019-01-01
Supplement: c9ra08831h1.pdf [file c9ra08831h1.pdf]

## **Electronic Supplementary Information**

- 1. Spectra of compound 1**
- 2. Spectra of compound 2**
- 3. Spectra of compound 3**
- 4. Spectra of compound 4**
- 5. Spectra of compound 5**
- 6. Spectra of compound 6**

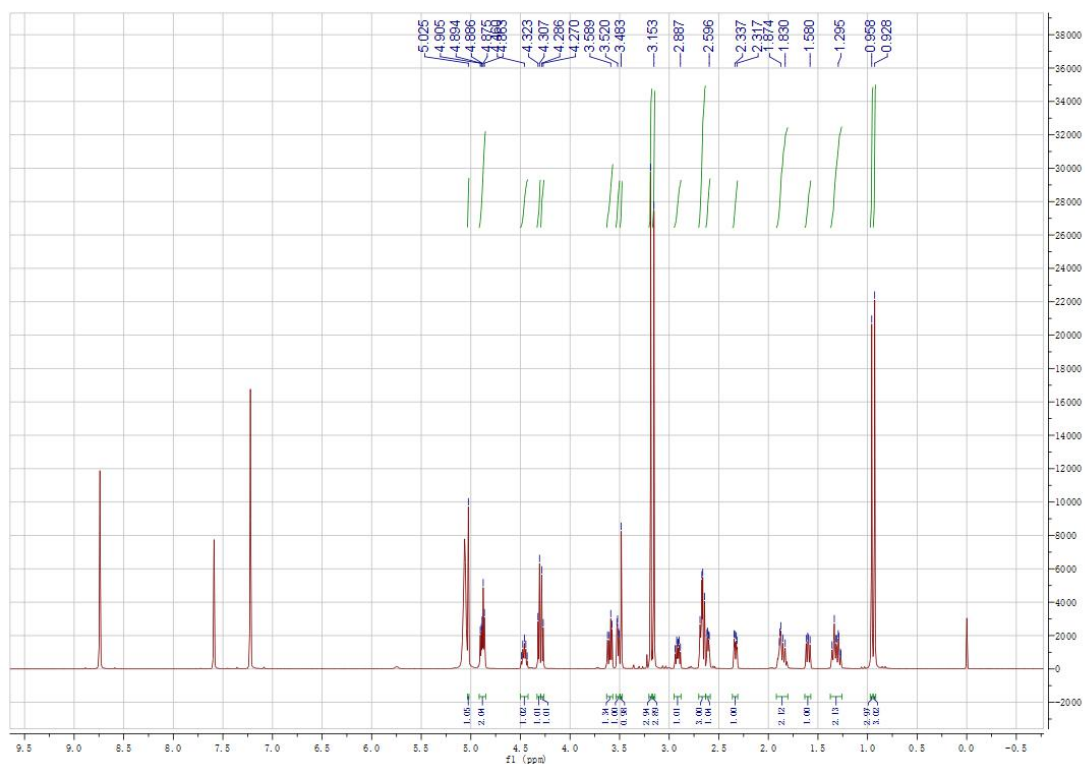

**Fig 1. The  $^1\text{H}$ -NMR spectrum of 1**

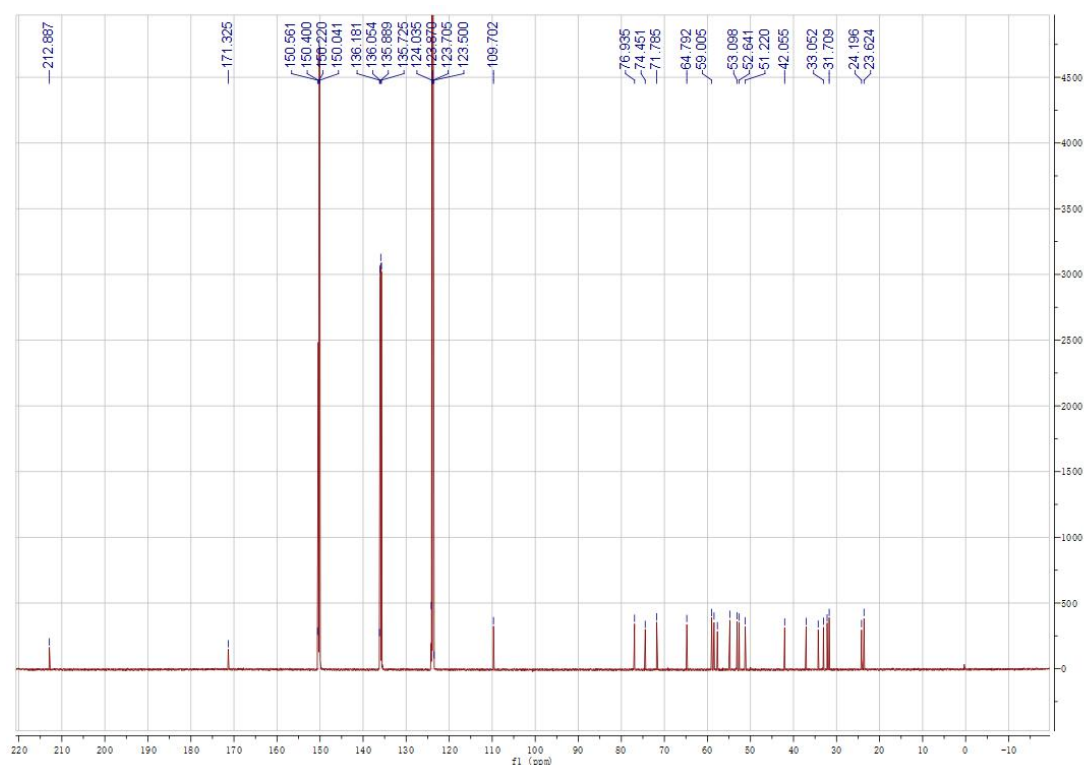

**Fig 2. The  $^{13}\text{C}$ -NMR spectrum of 1**

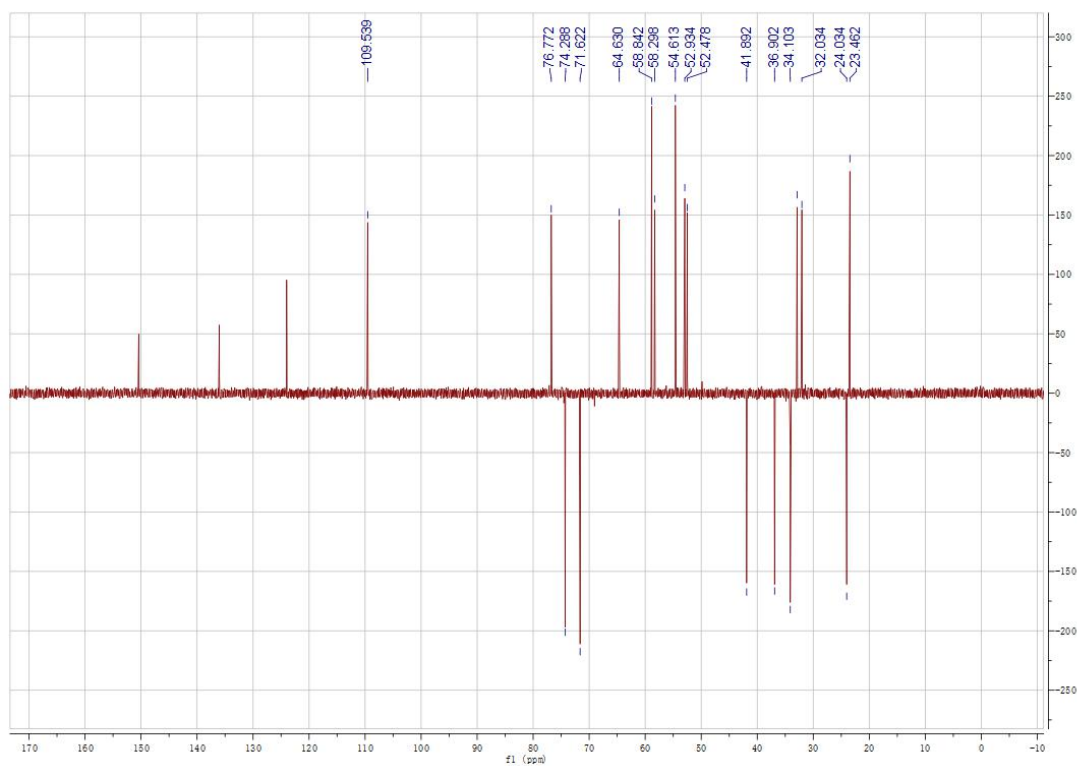

**Fig 3.**  $^{13}\text{C}$ -NMR-DEPT spectrum of **1**

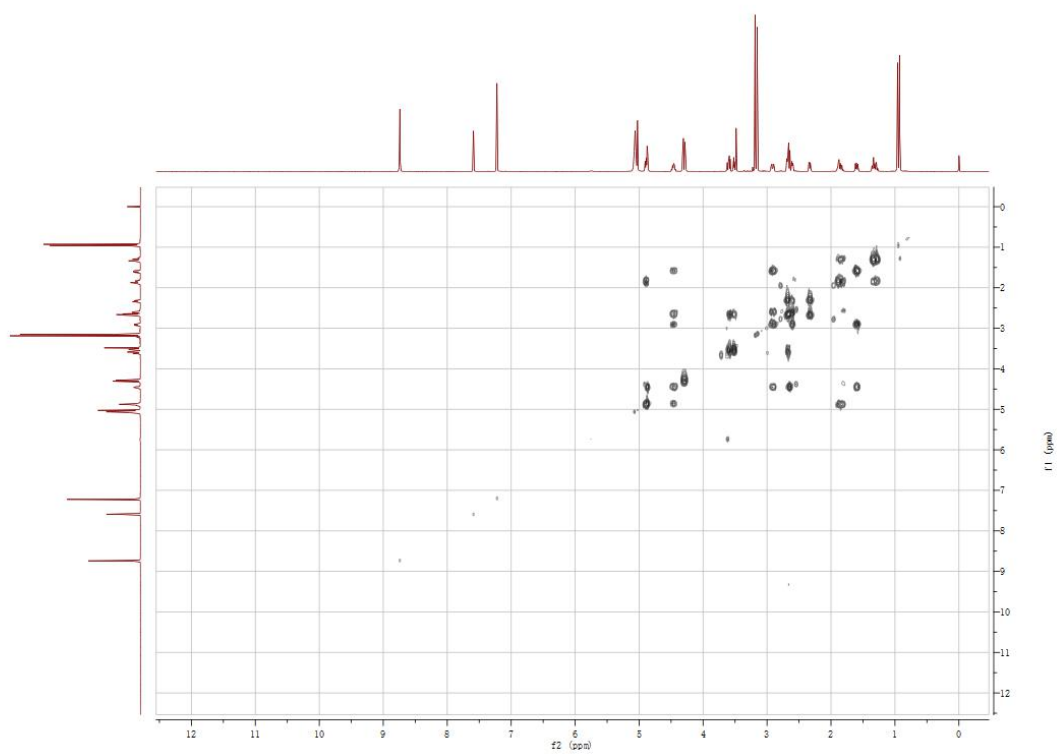

**Fig 4.**  $^1\text{H}$ - $^1\text{H}$  COSY spectrum of **1**

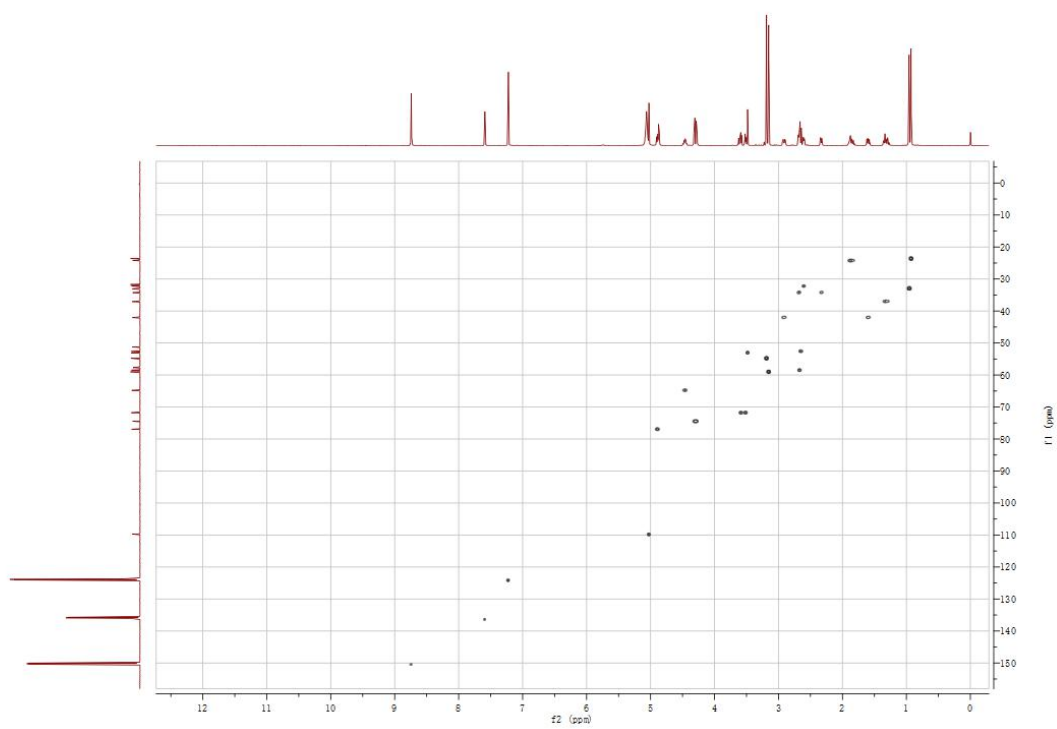

**Fig 5. HSQC spectrum of 1**

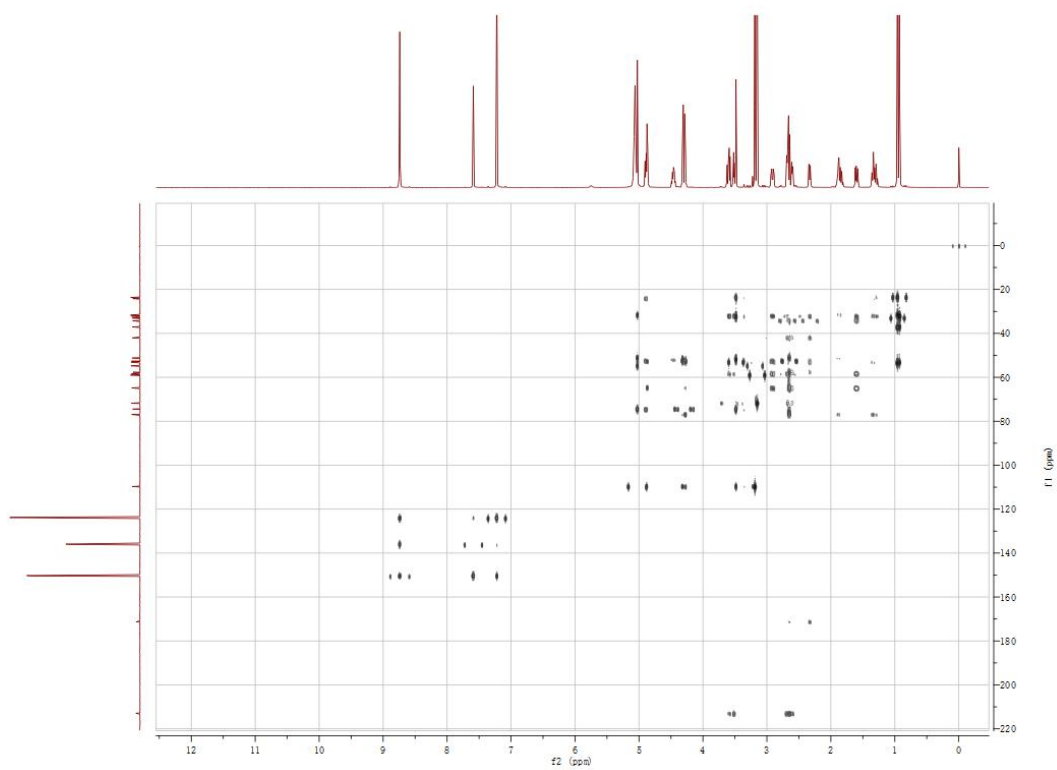

**Fig 6. HMBC spectrum of 1**

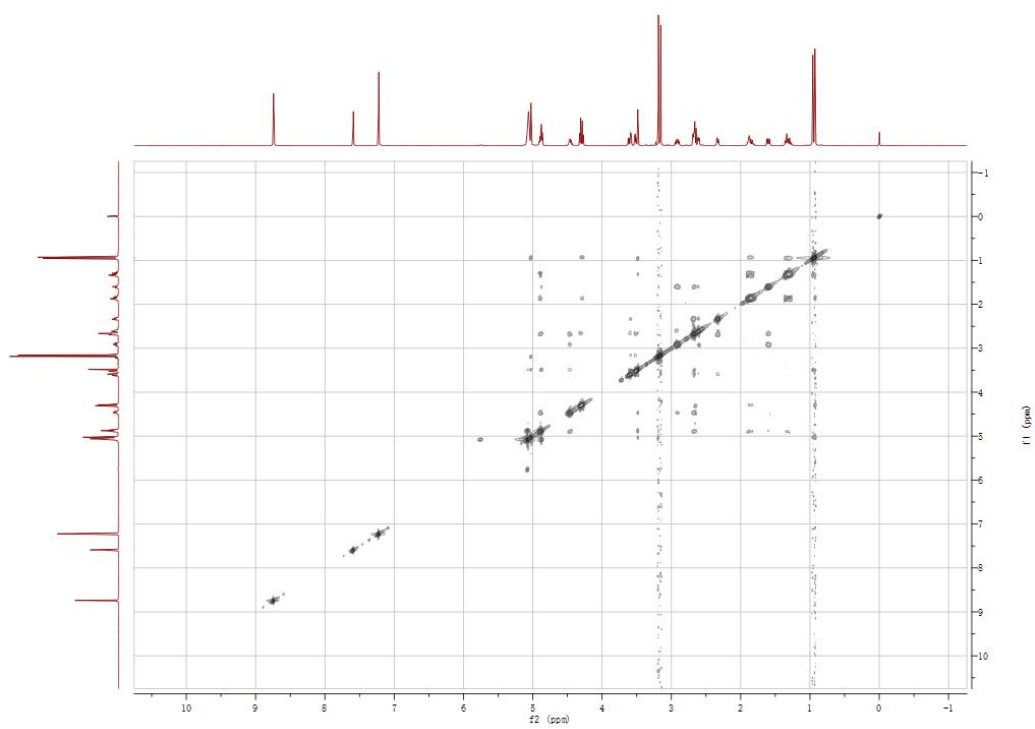

**Fig 7. ROESY spectrum of 1**

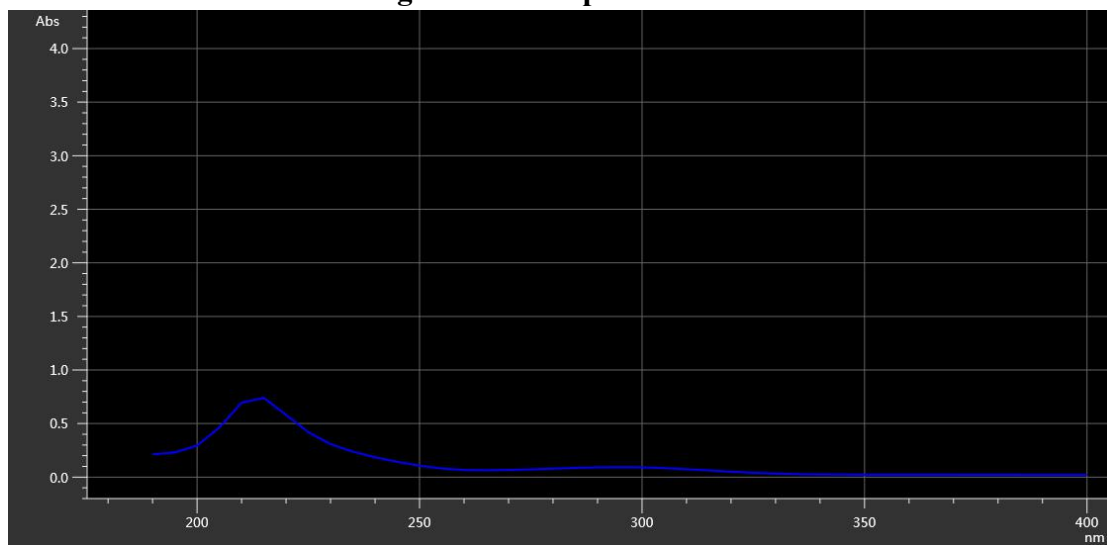

**Fig 8. UV spectrum of 1**

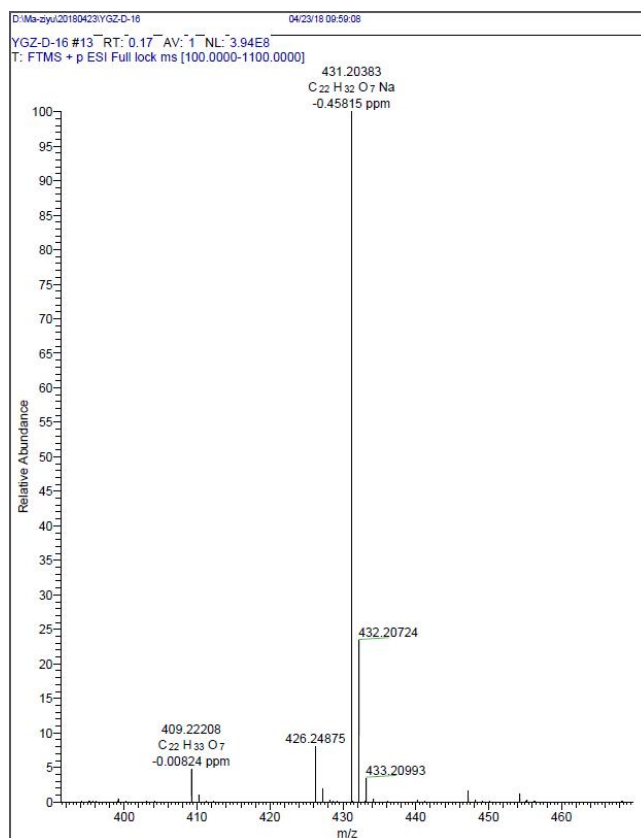

Fig 9. HR-ESI-MS of 1

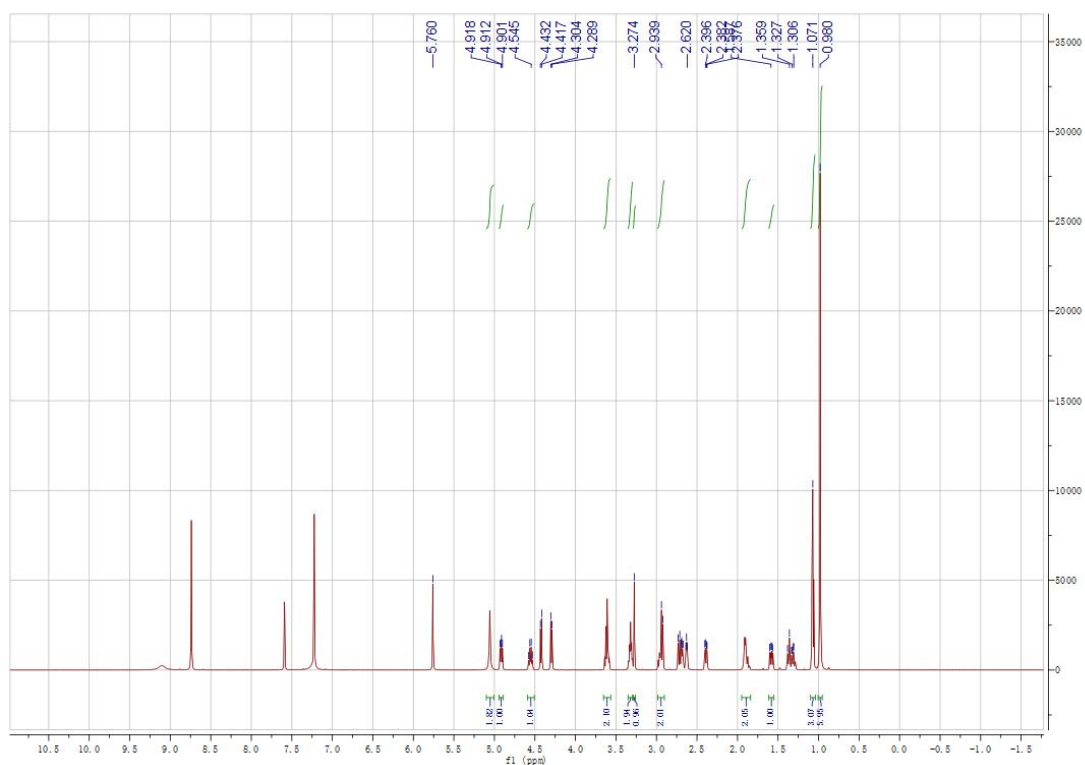

Fig 10. The <sup>1</sup>H-NMR spectrum of 2

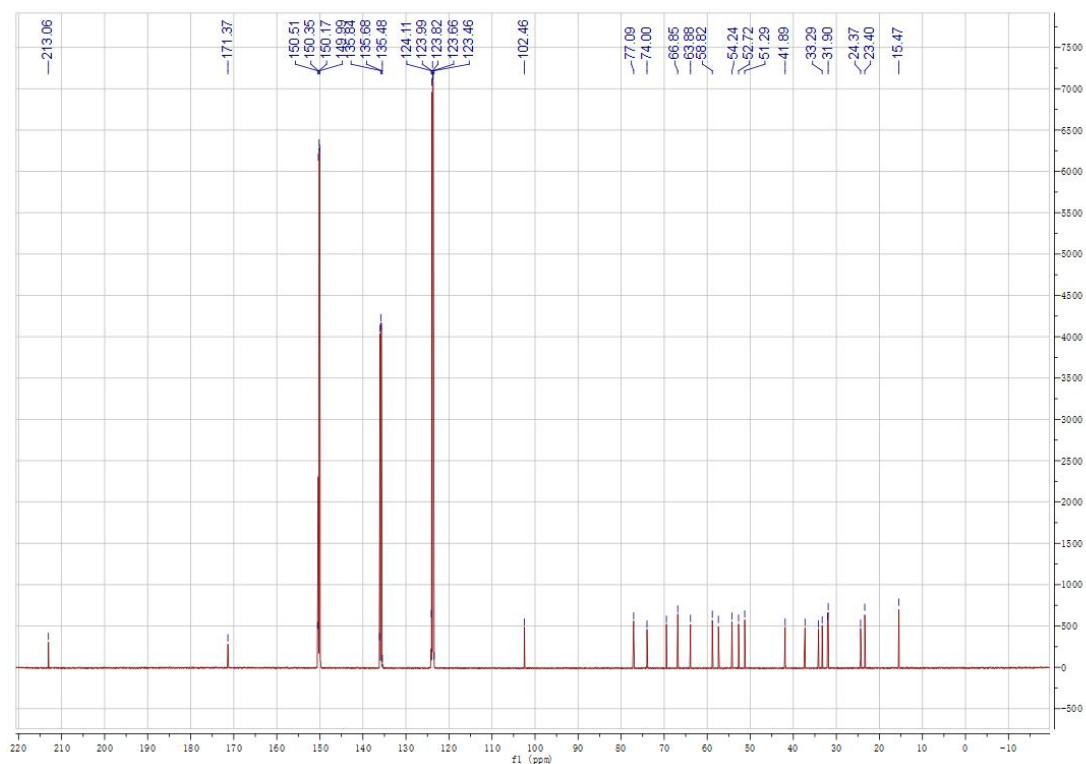

**Fig 11. The  $^{13}\text{C-NMR}$  spectrum of 2**

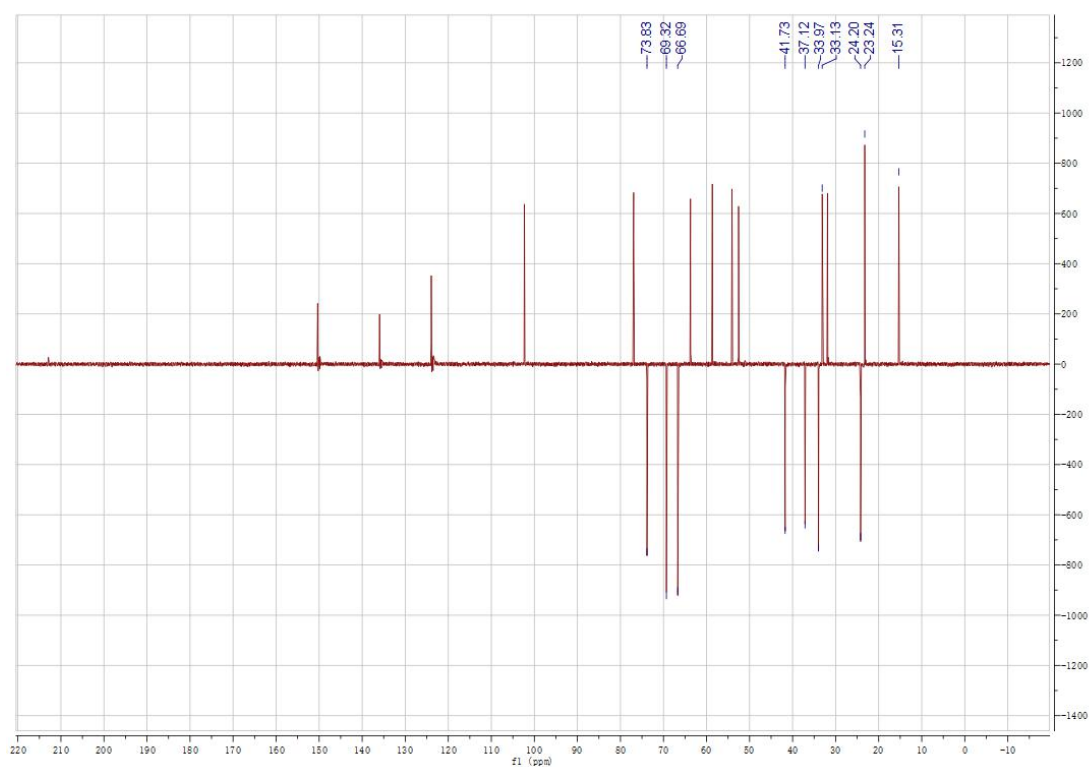

**Fig 12.  $^{13}\text{C-NMR-DEPT}$  spectrum of 2**

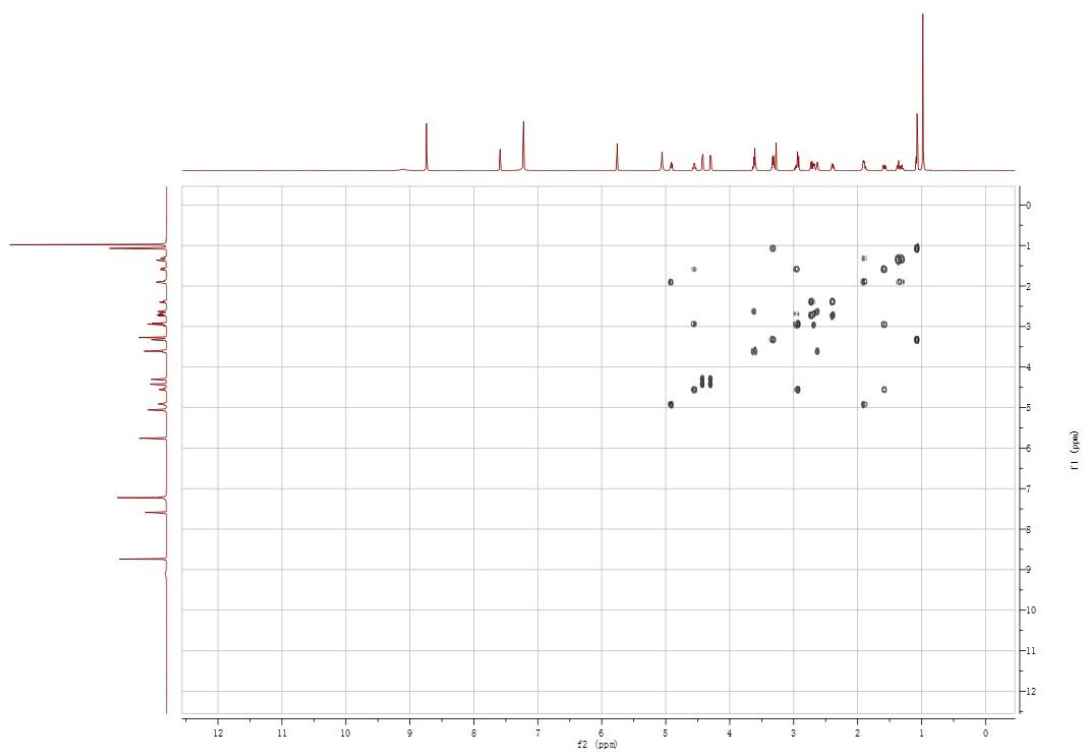

**Fig 13.  $^1\text{H}$ - $^1\text{H}$  COSY spectrum of 2**

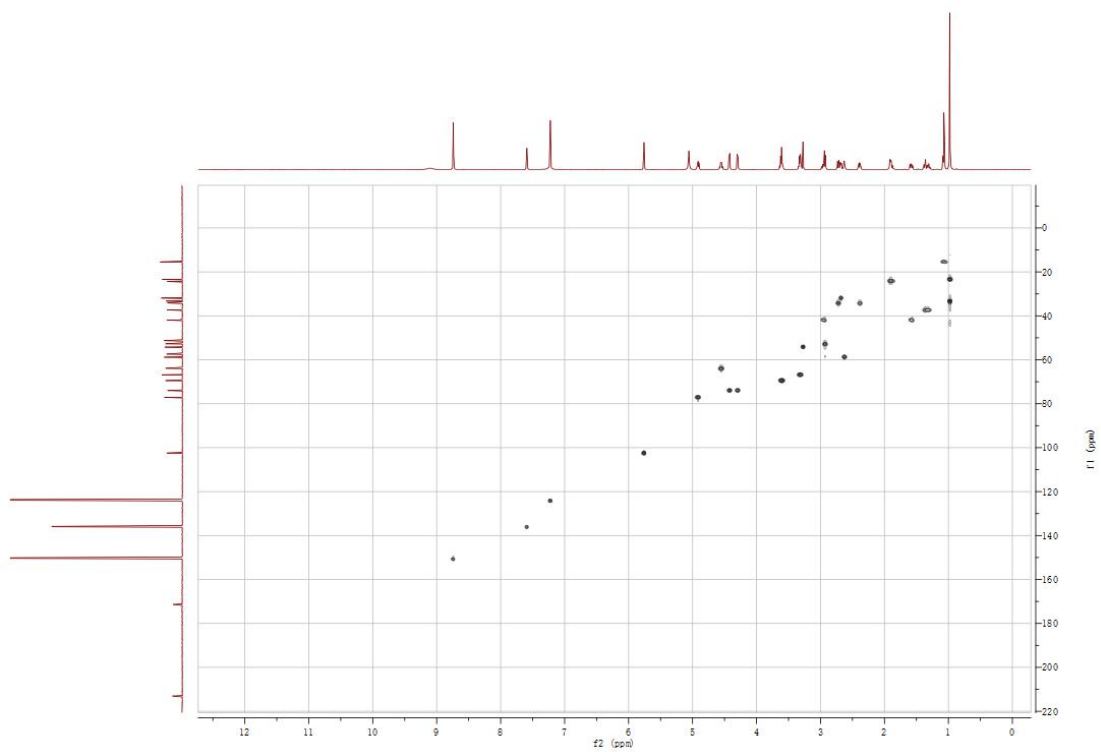

**Fig 14. HSQC spectrum of 2**



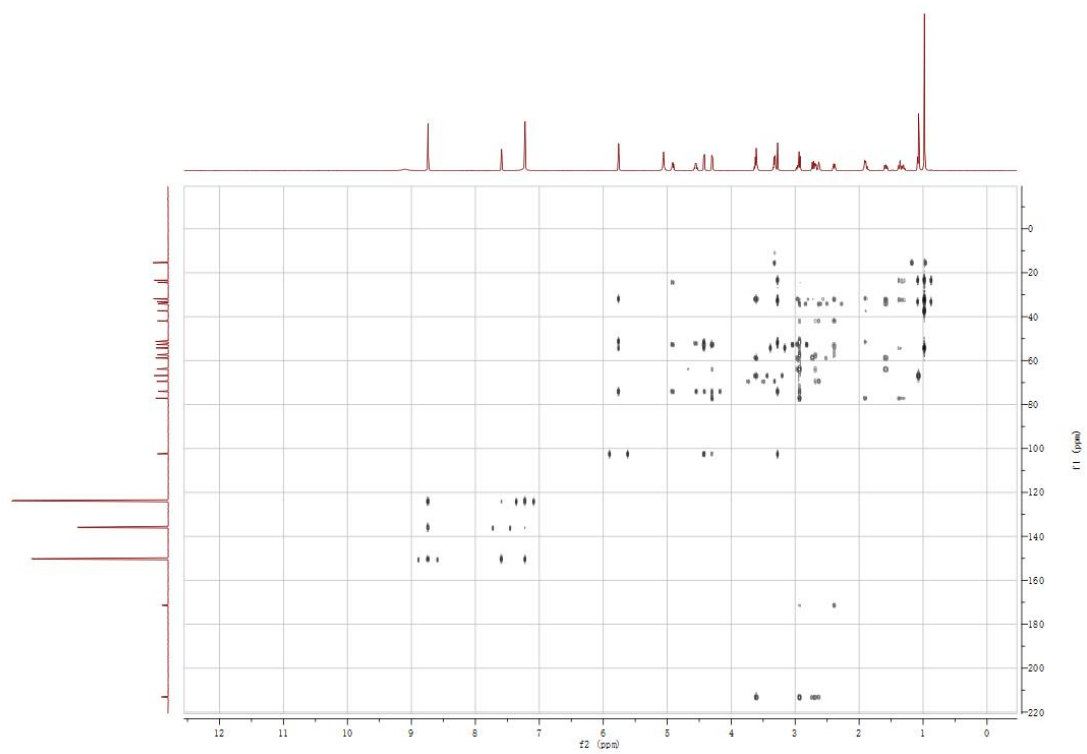

**Fig 15. HMBC spectrum of 2**

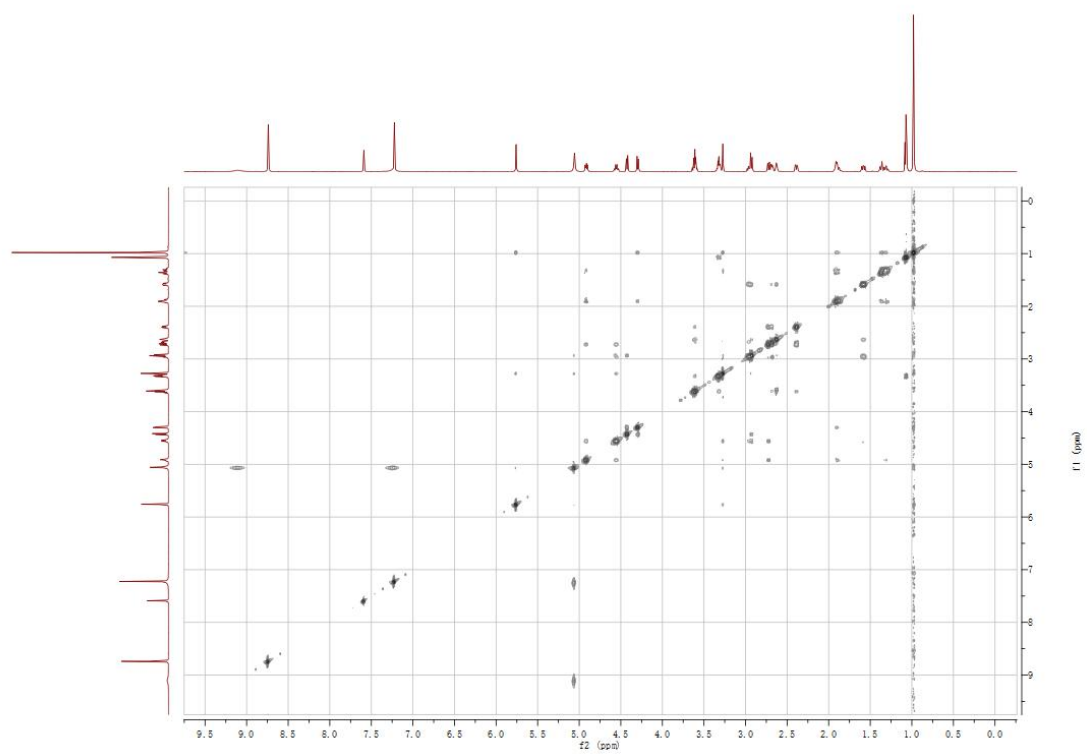

**Fig 16. ROESY spectrum of 2**

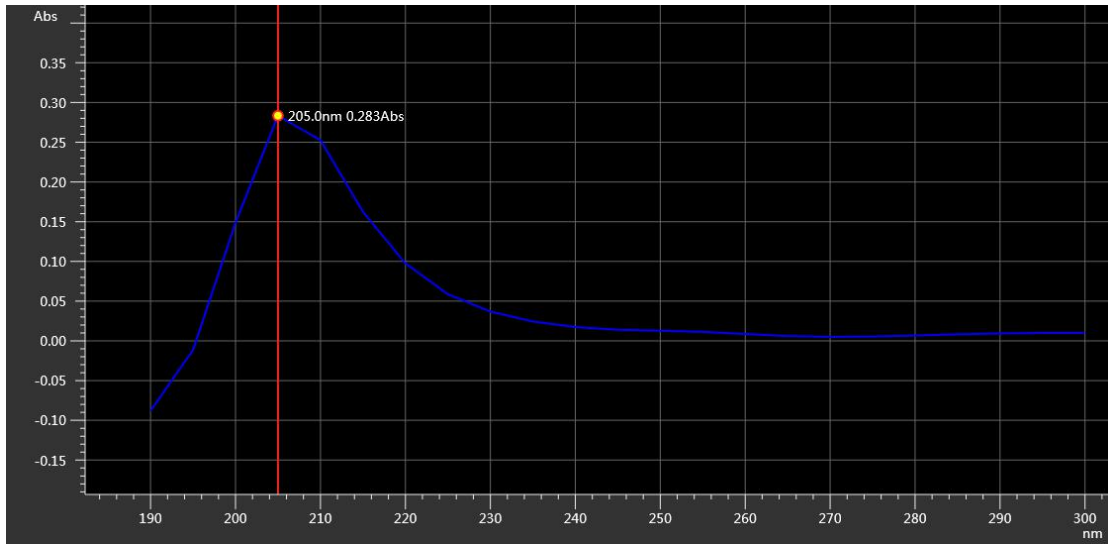

Fig 17. UV spectrum of 2

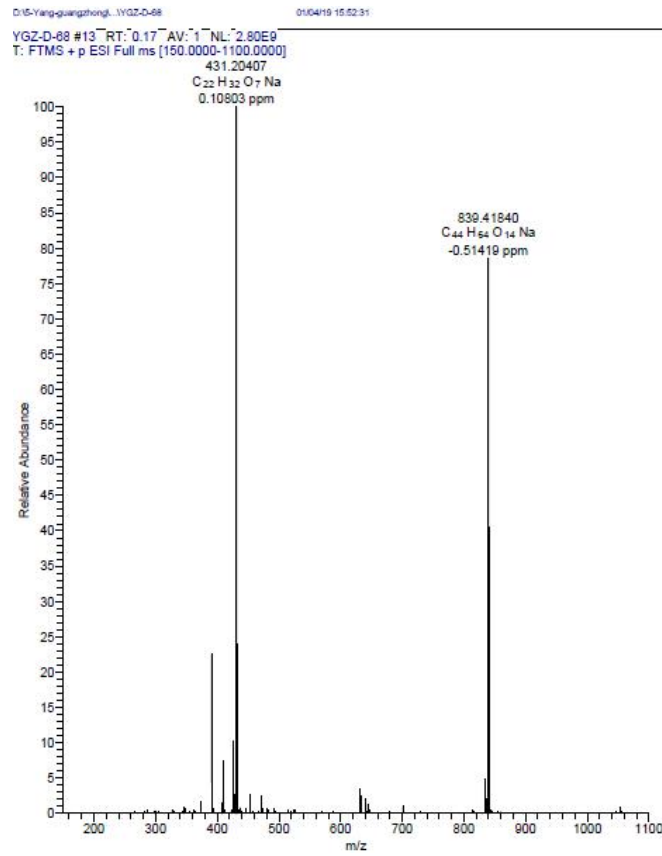

Fig 18. HR-ESI-MS of 2

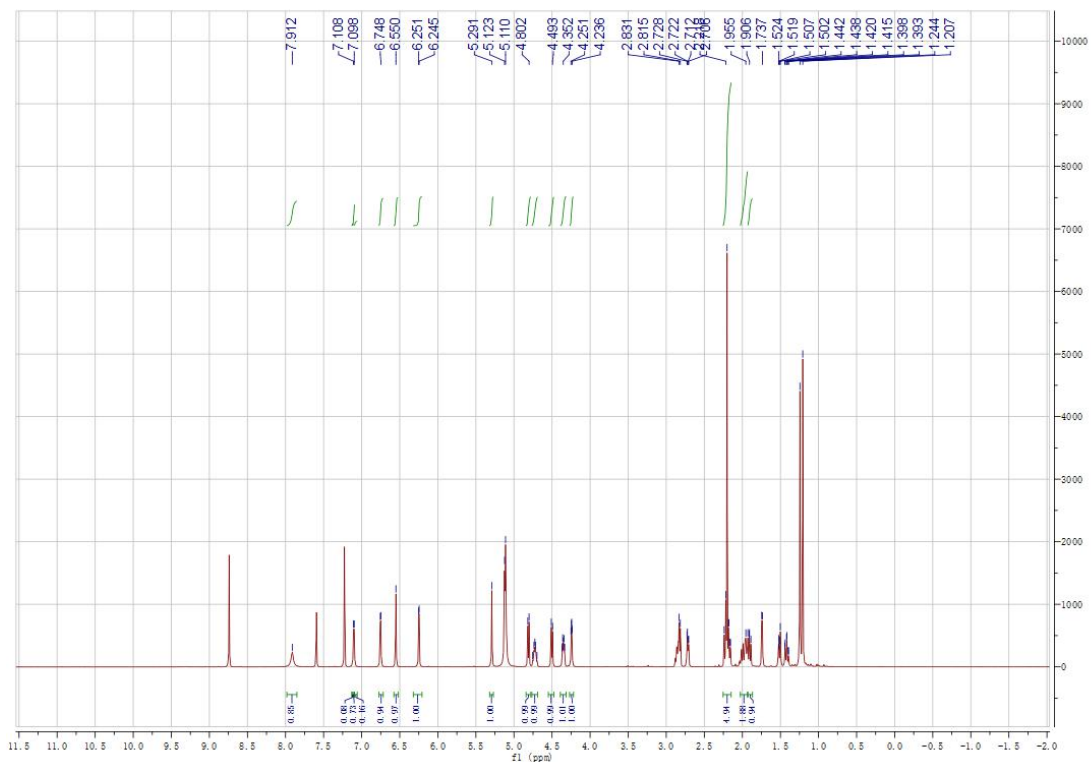

Fig 19. The  $^1\text{H}$ -NMR spectrum of 3

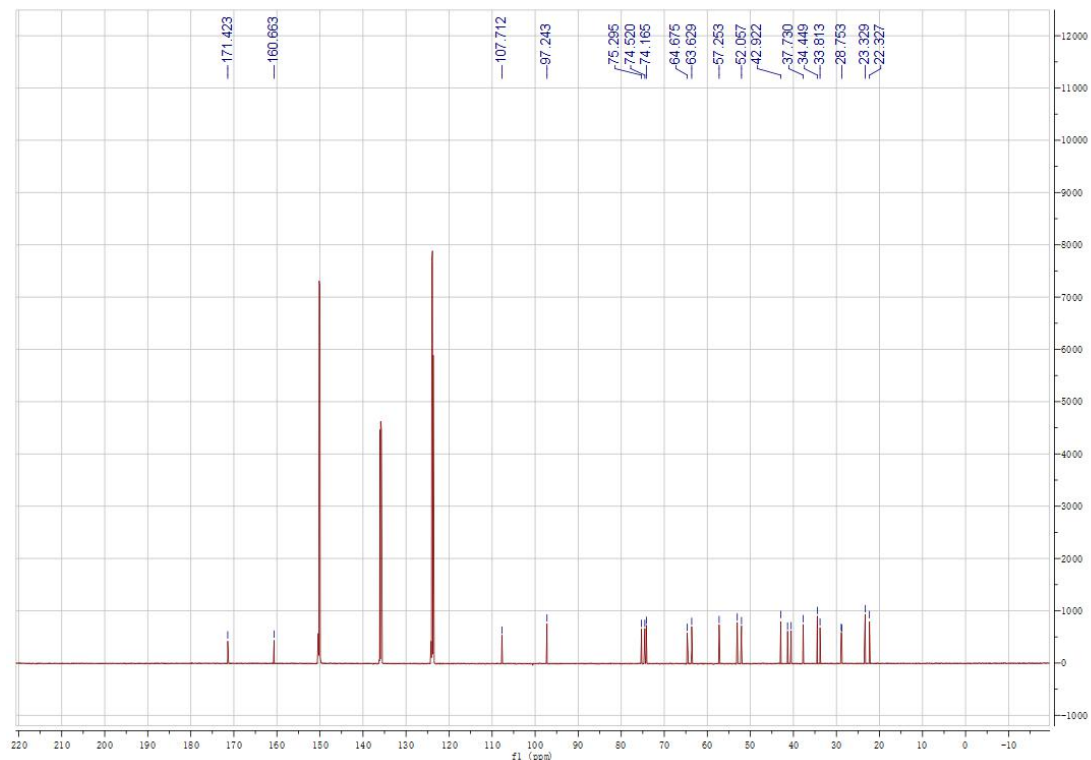

Fig 20. The  $^{13}\text{C}$ -NMR spectrum of 3

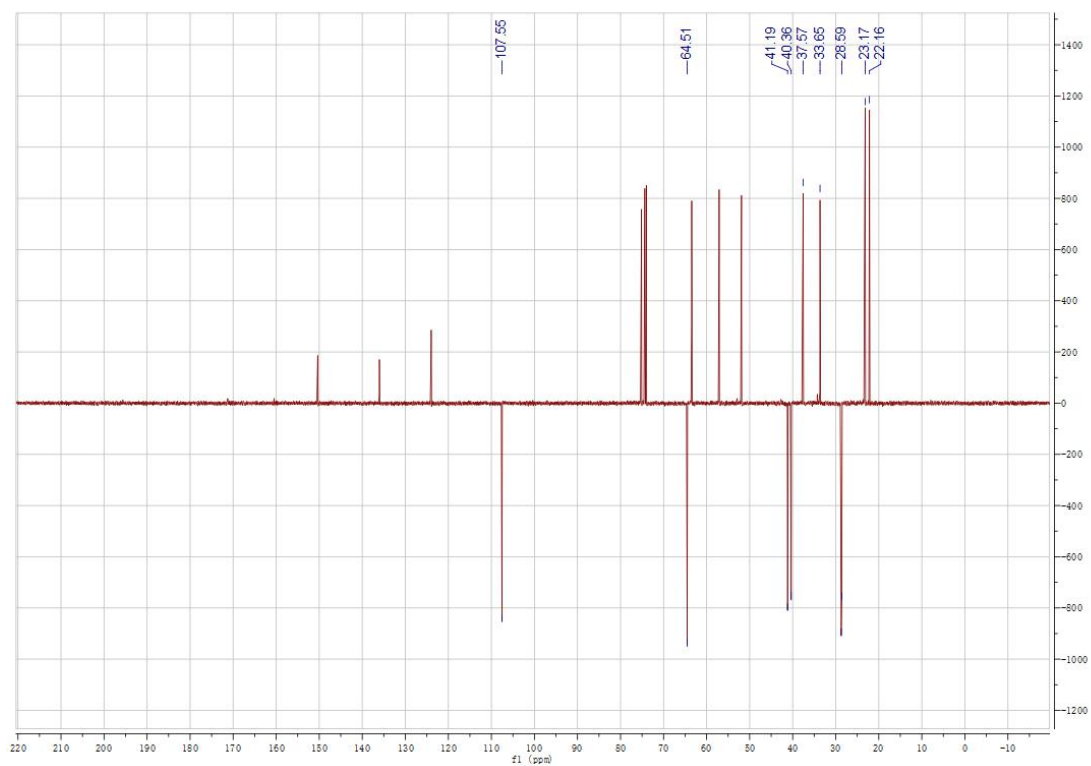

Fig 21.  $^{13}\text{C}$ -NMR-DEPT spectrum of 3

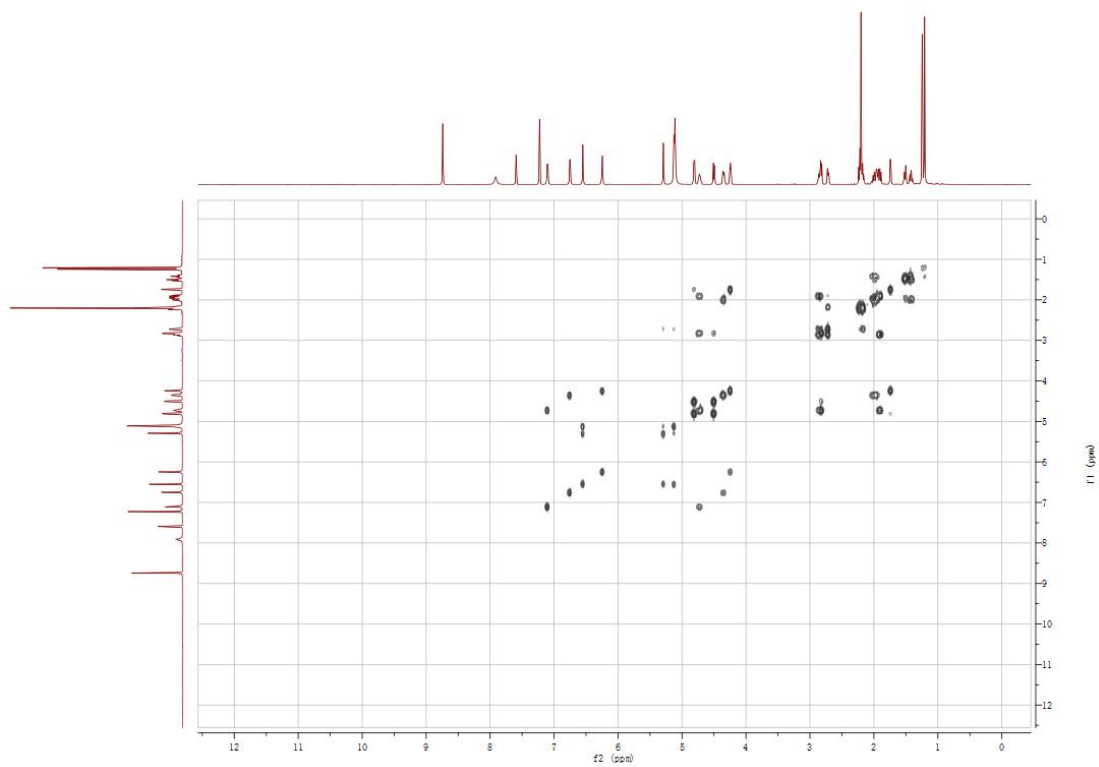

Fig 22.  $^1\text{H}$ - $^1\text{H}$  COSY spectrum of 3

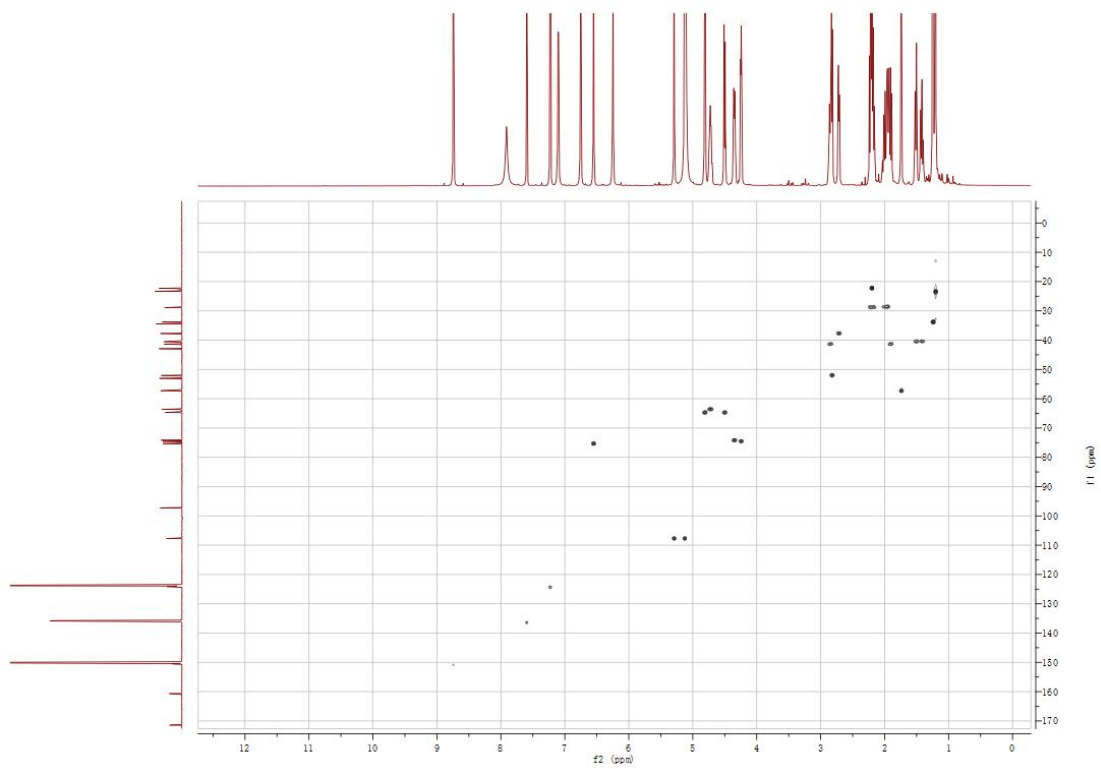

**Fig 23. HSQC spectrum of 3**

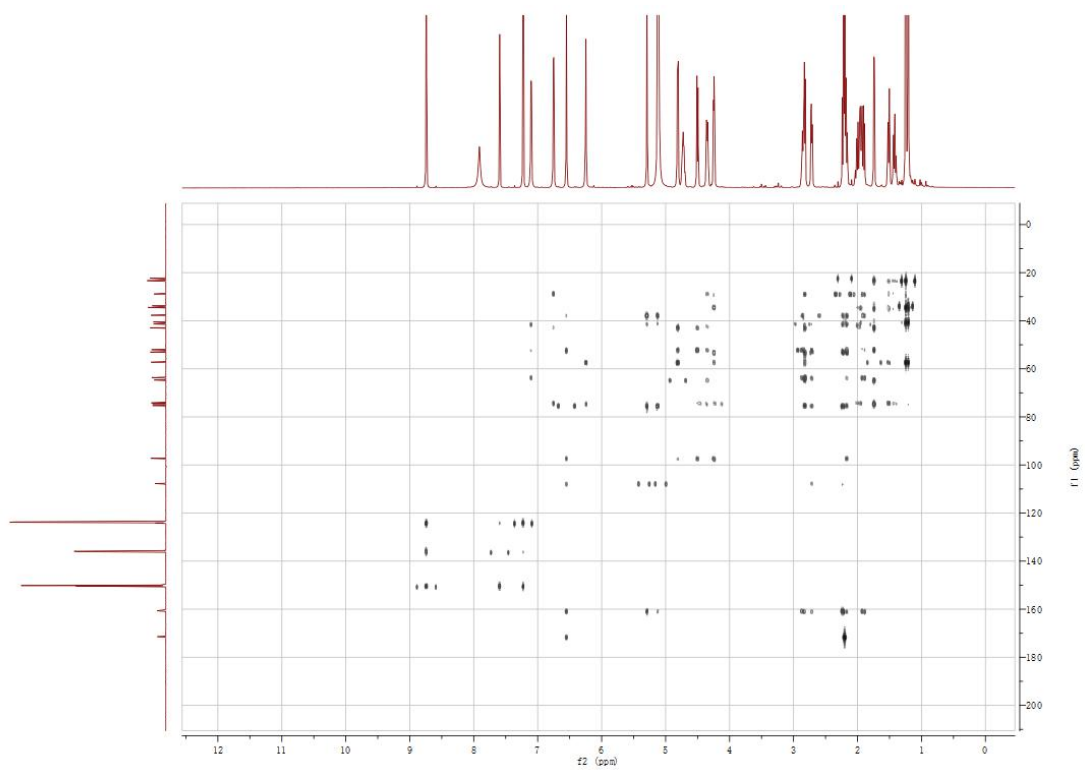

**Fig 24. HMBC spectrum of 3**

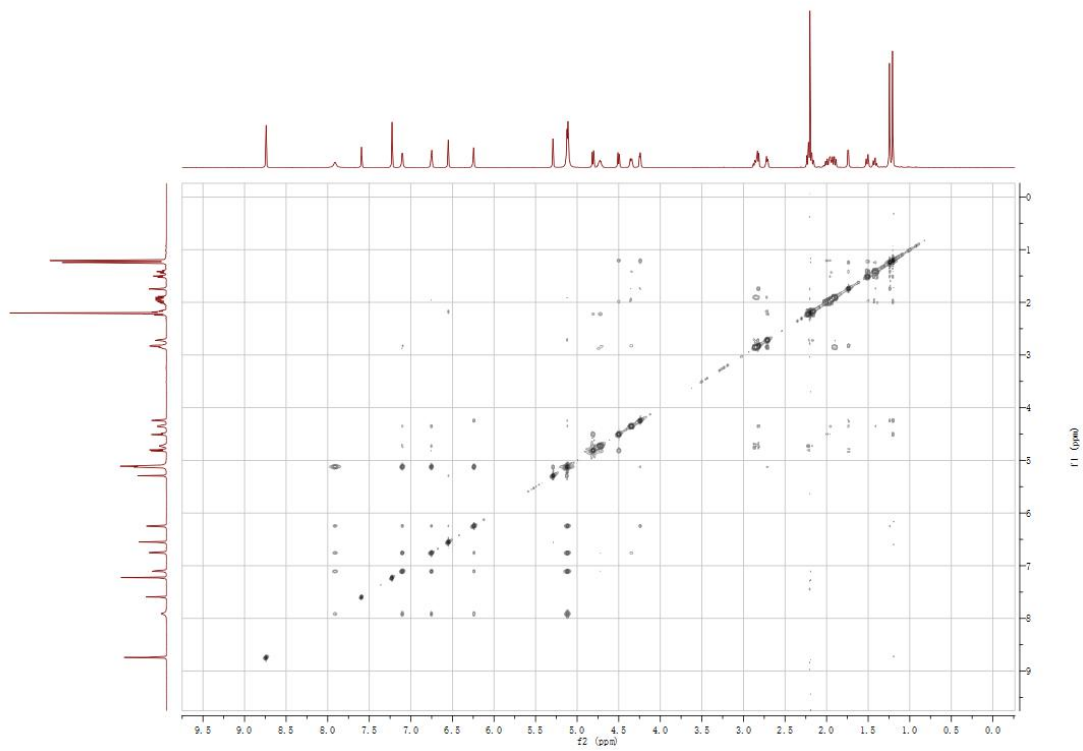

**Fig 25. ROESY spectrum of 3**

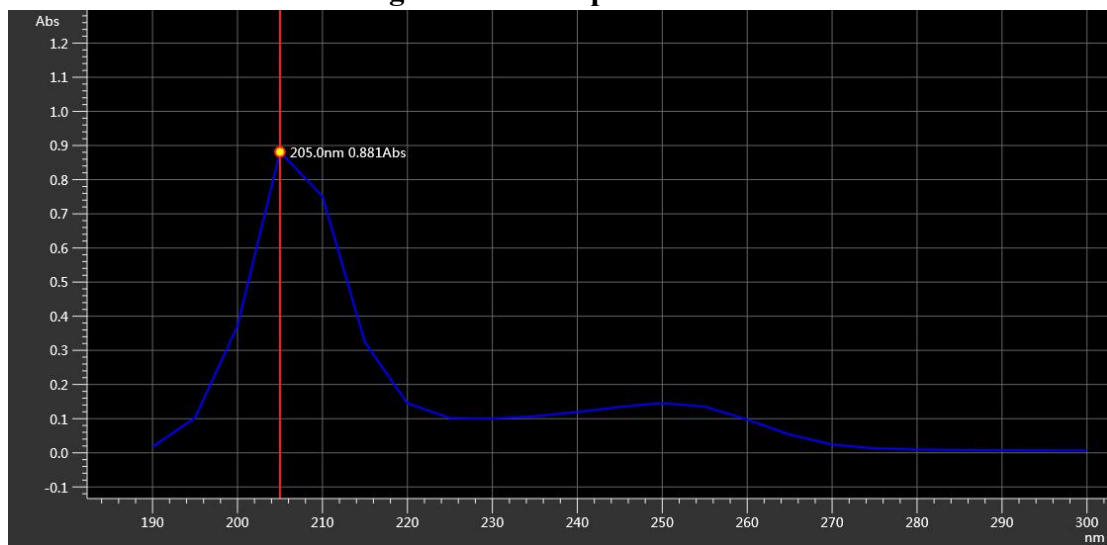

**Fig 26. UV spectrum of 3**

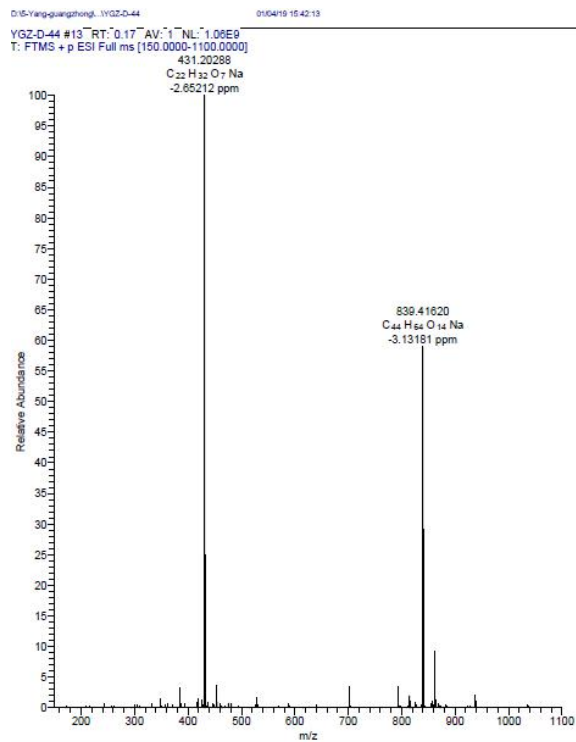

**Fig 27. HR-ESI-MS of 3**

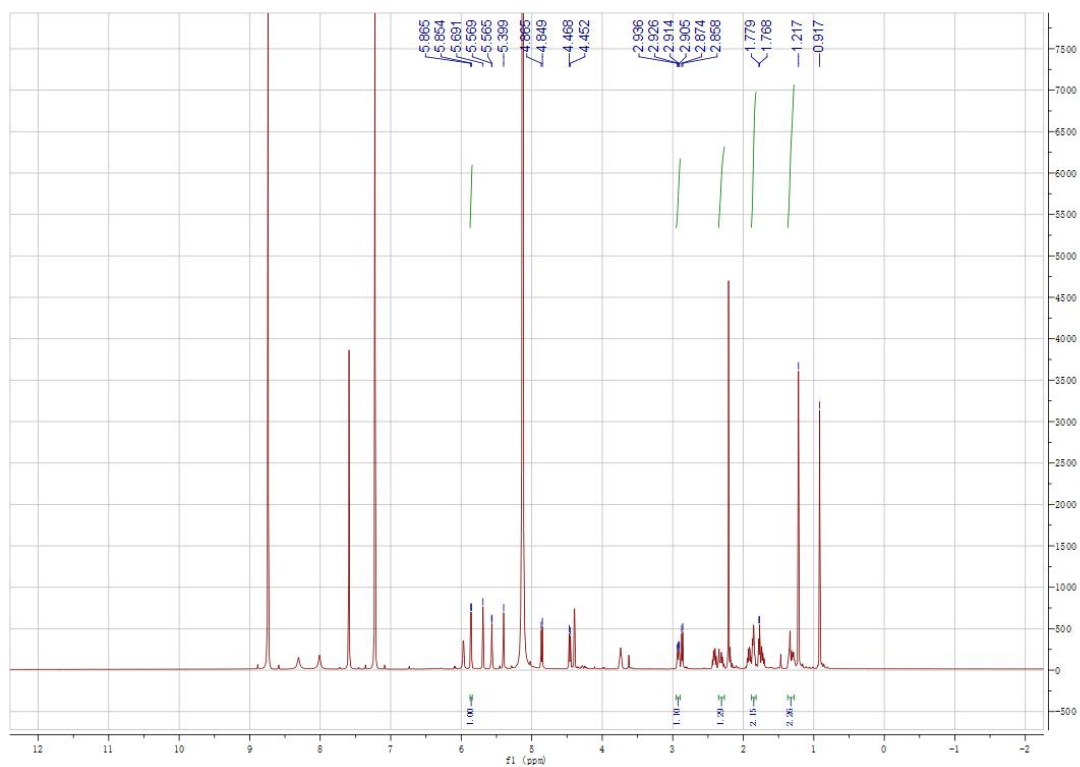

**Fig 28. The <sup>1</sup>H-NMR spectrum of 4**

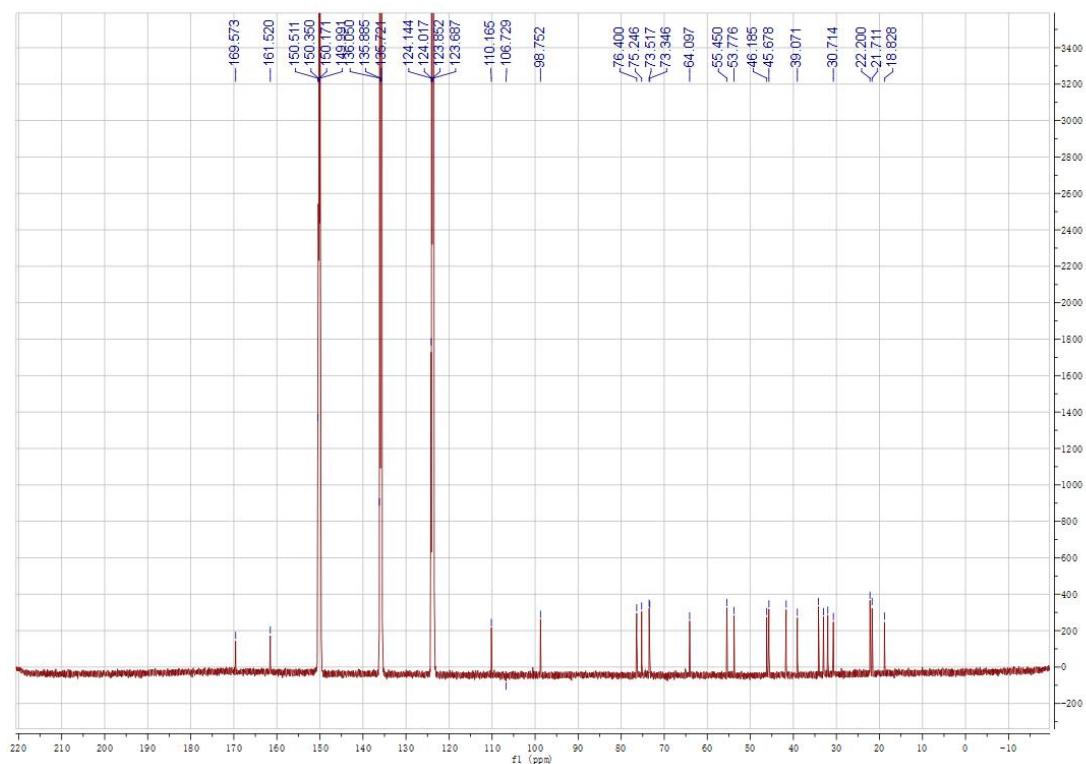

Fig 29. The <sup>13</sup>C-NMR spectrum of 4

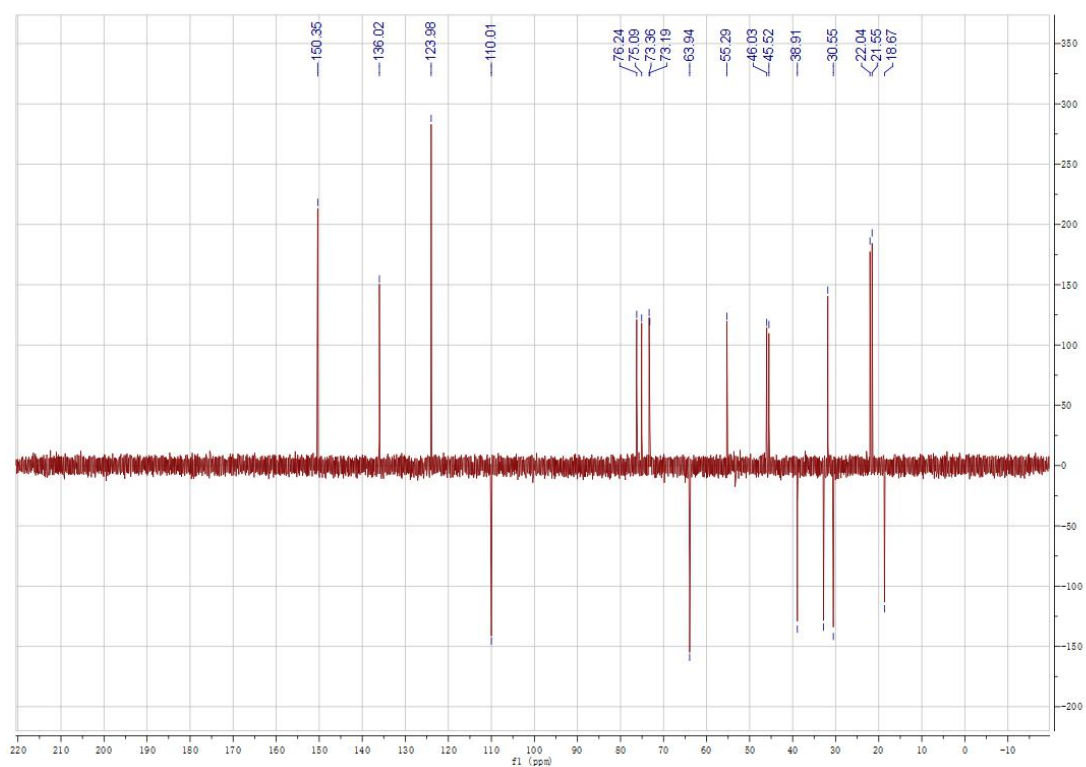

Fig 30. <sup>13</sup>C-NMR-DEPT spectrum of 4



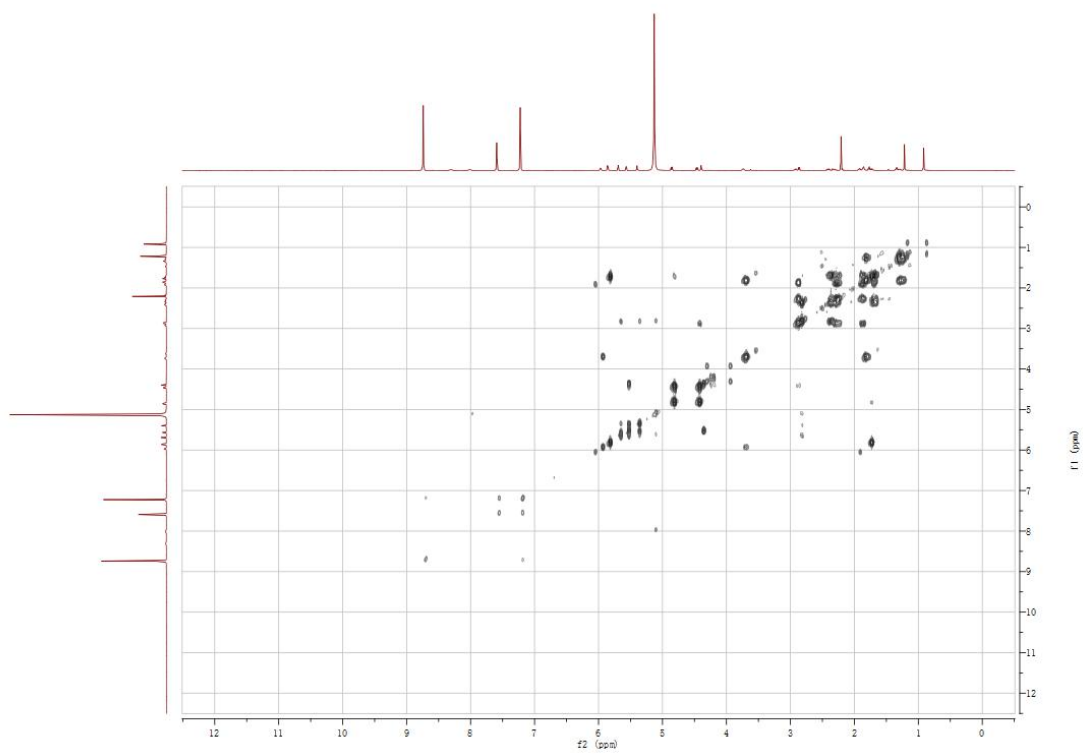

**Fig 31.  $^1\text{H}$ - $^1\text{H}$  COSY spectrum of 4**

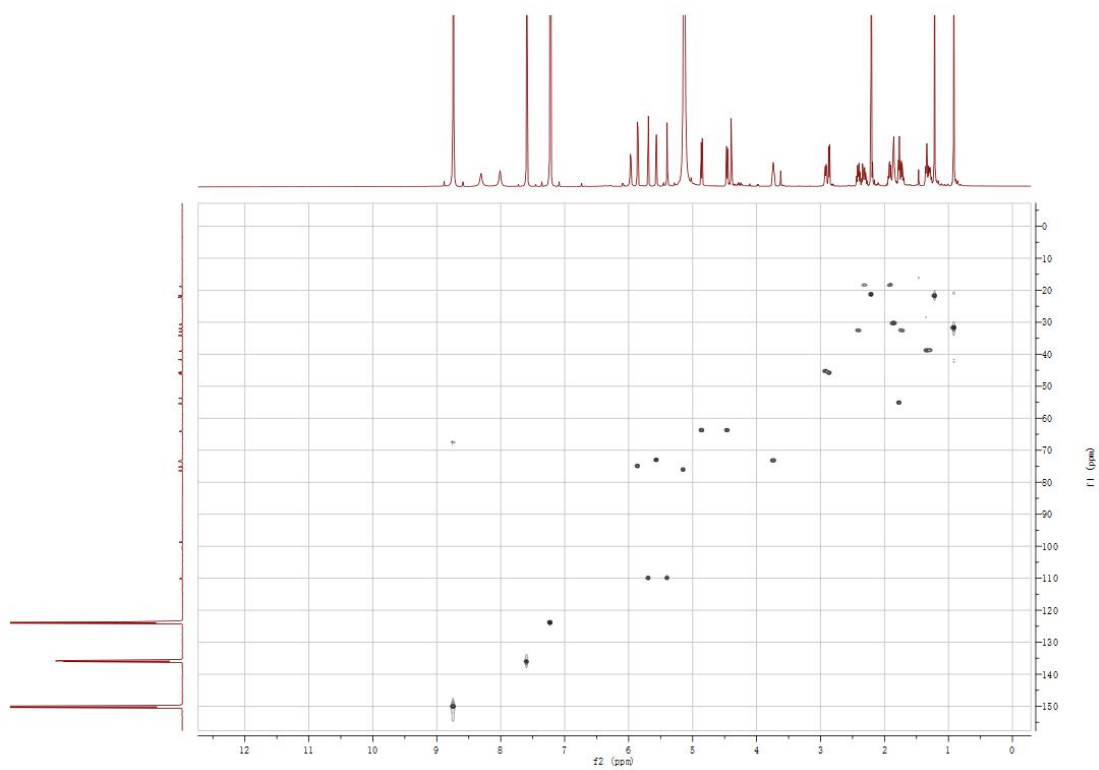

**Fig 32. HSQC spectrum of 4**

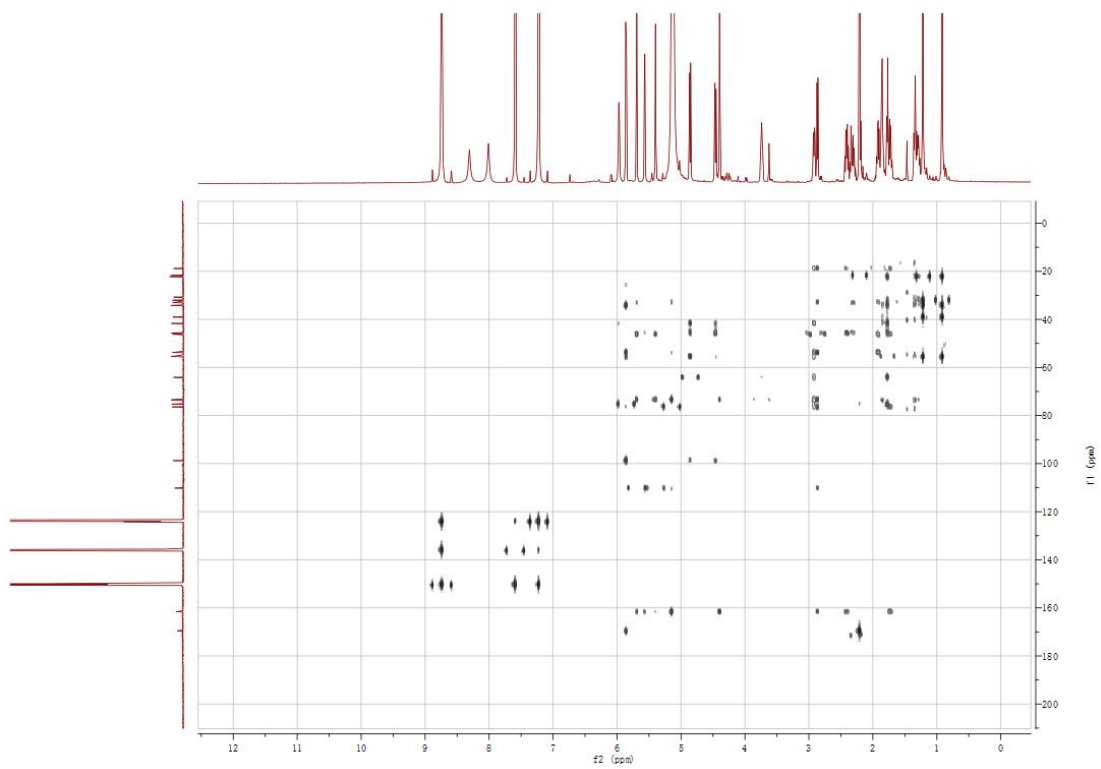

**Fig 33. HMBC spectrum of 4**

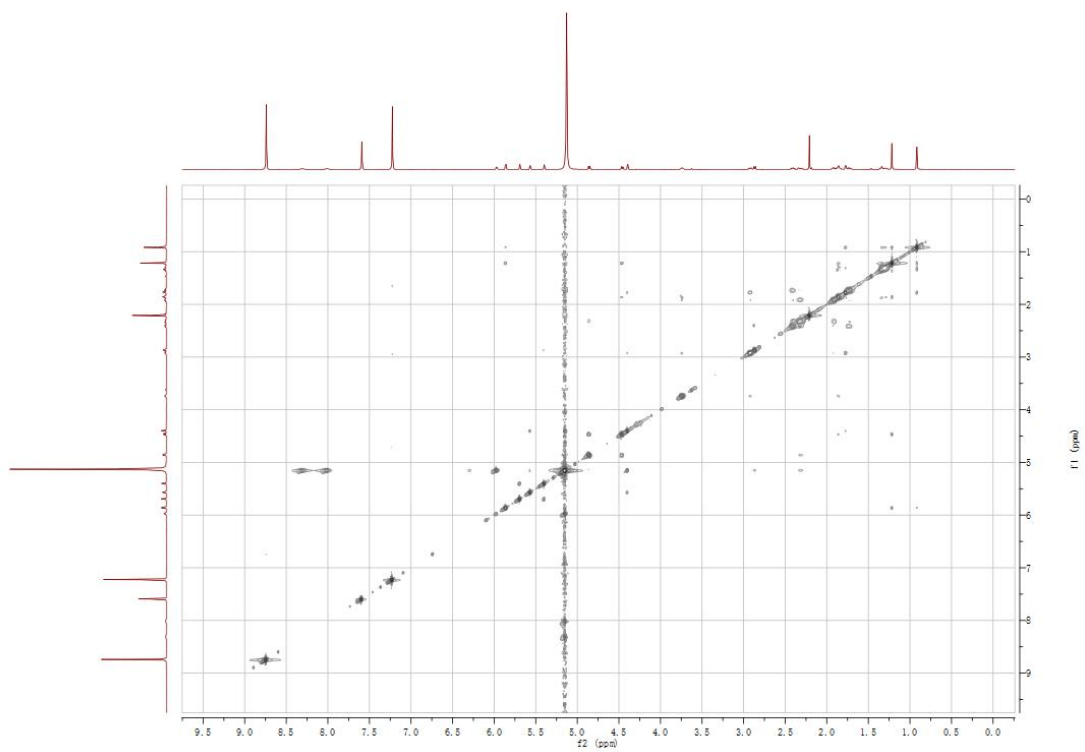

**Fig 34. ROESY spectrum of 4**

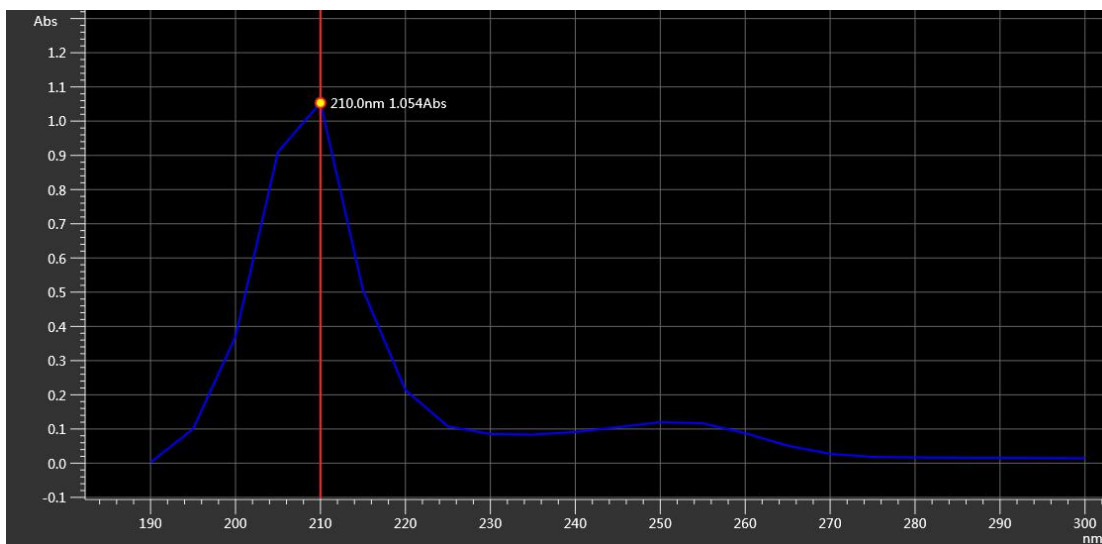

Fig 35. UV spectrum of 4

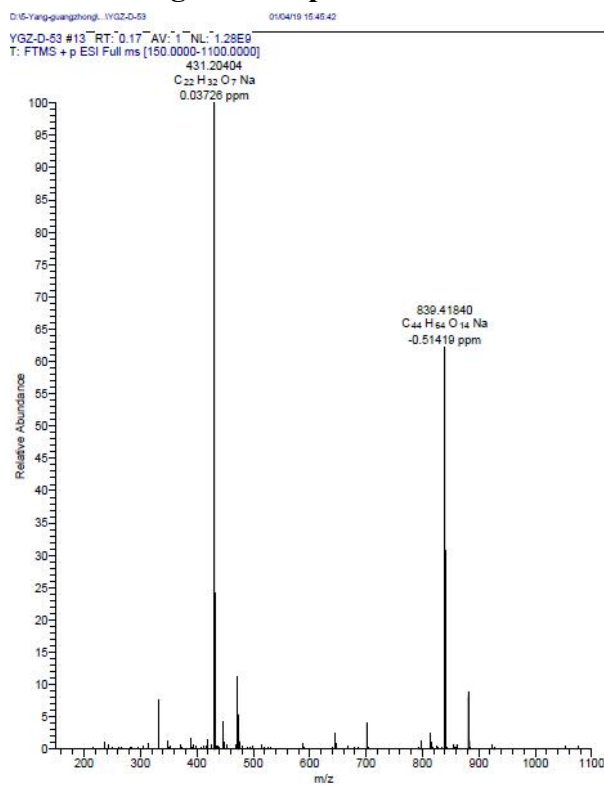

Fig 36. HR-ESI-MS of 4

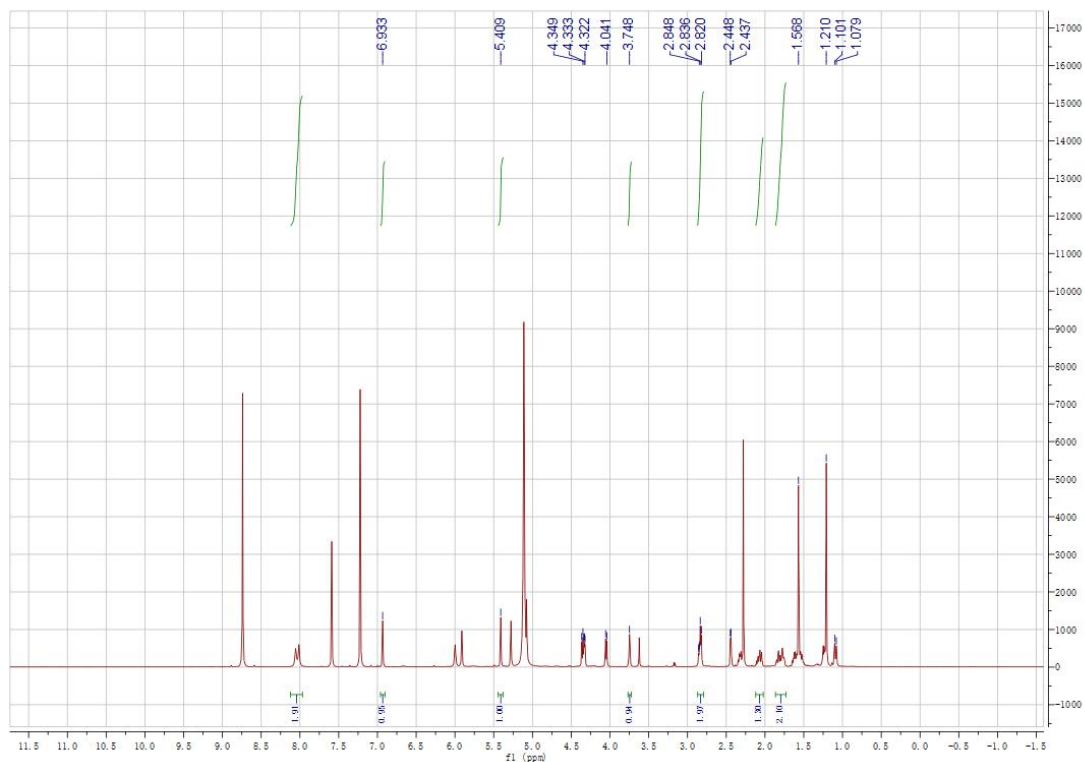

Fig 37. The  $^1\text{H}$ -NMR spectrum of **5**

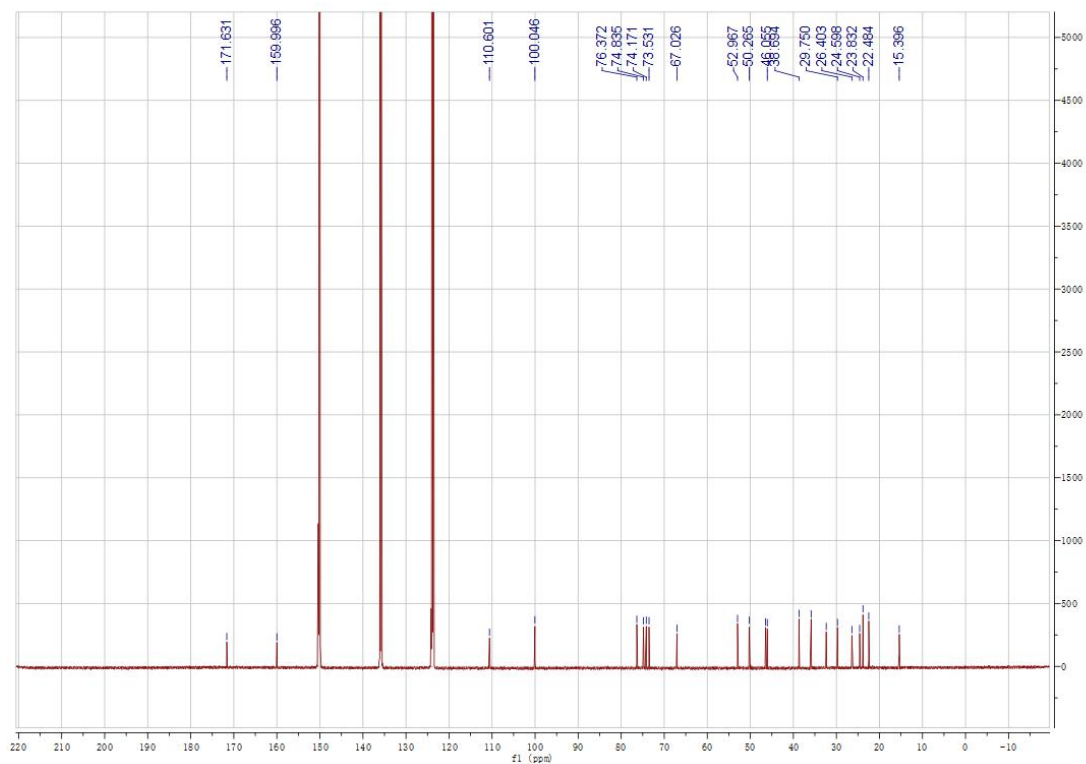

Fig 38. The  $^{13}\text{C}$ -NMR spectrum of **5**

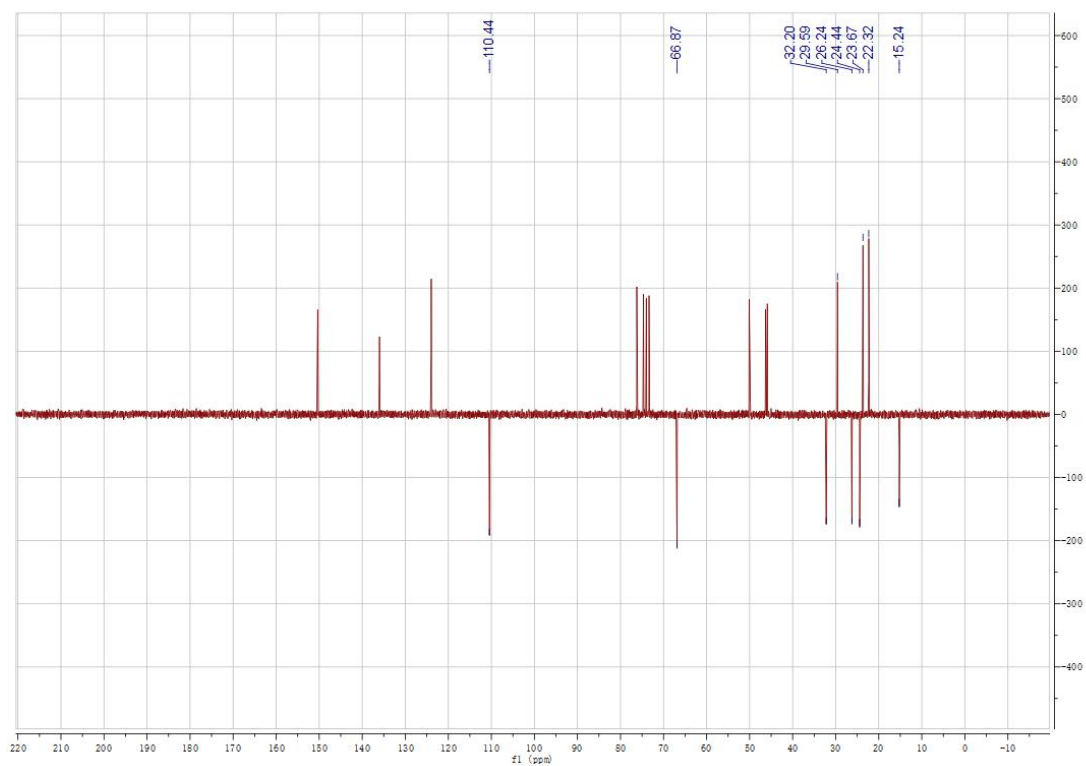

**Fig 39.**  $^{13}\text{C}$ -NMR-DEPT spectrum of **5**

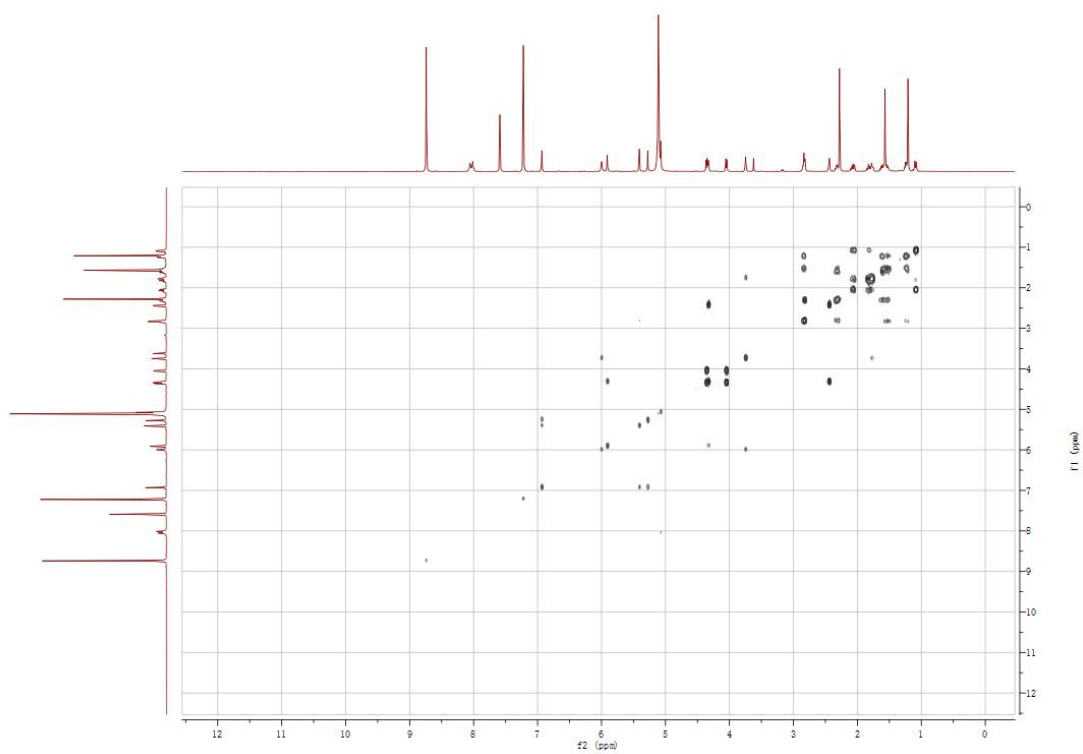

**Fig 40.**  $^1\text{H}$ - $^1\text{H}$  COSY spectrum of **5**

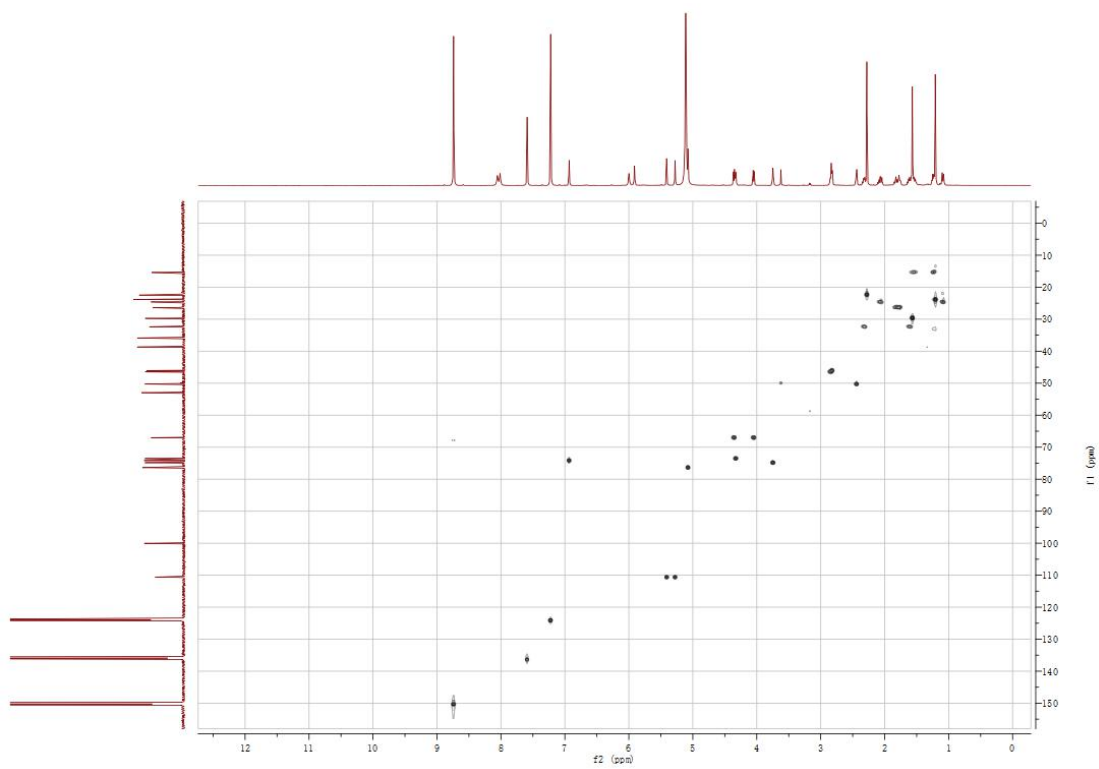

**Fig 41. HSQC spectrum of 5**

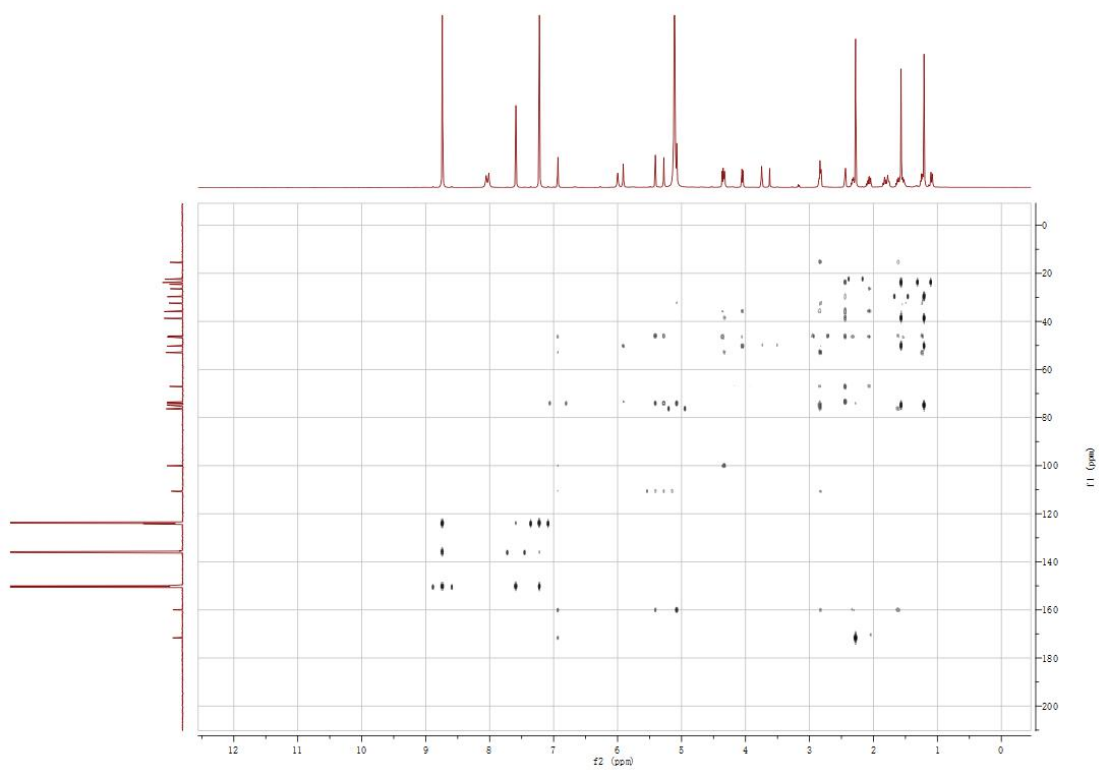

**Fig 42. HMBC spectrum of 5**

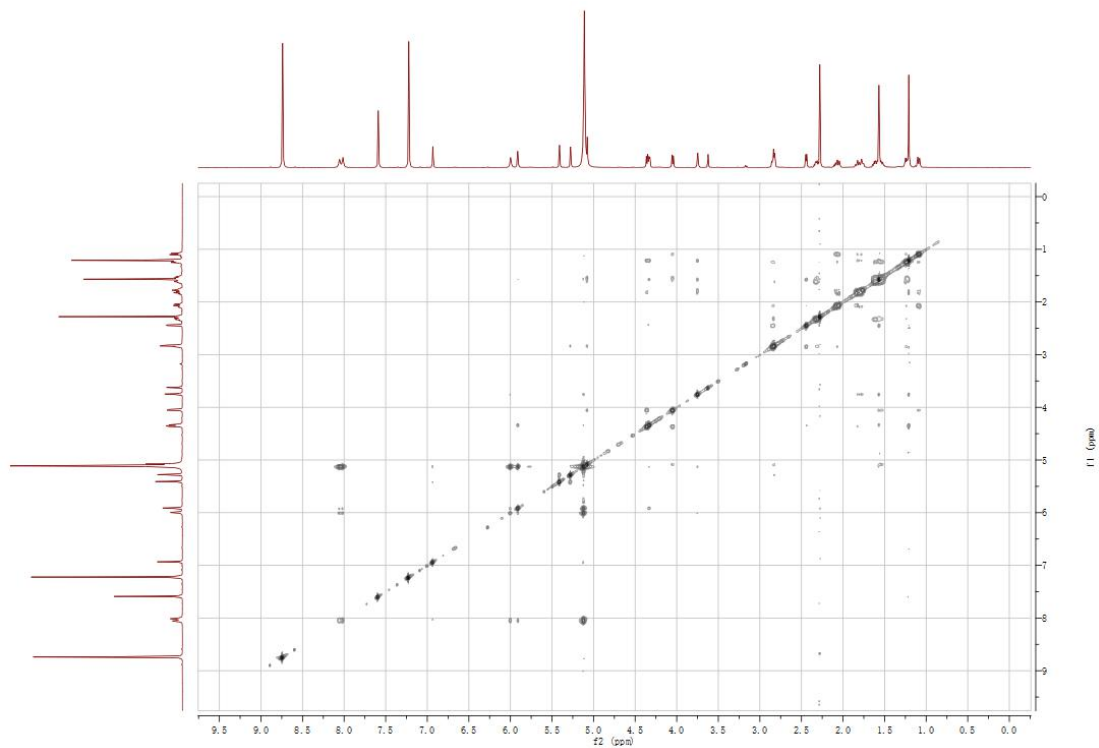

**Fig 43. ROESY spectrum of 5**

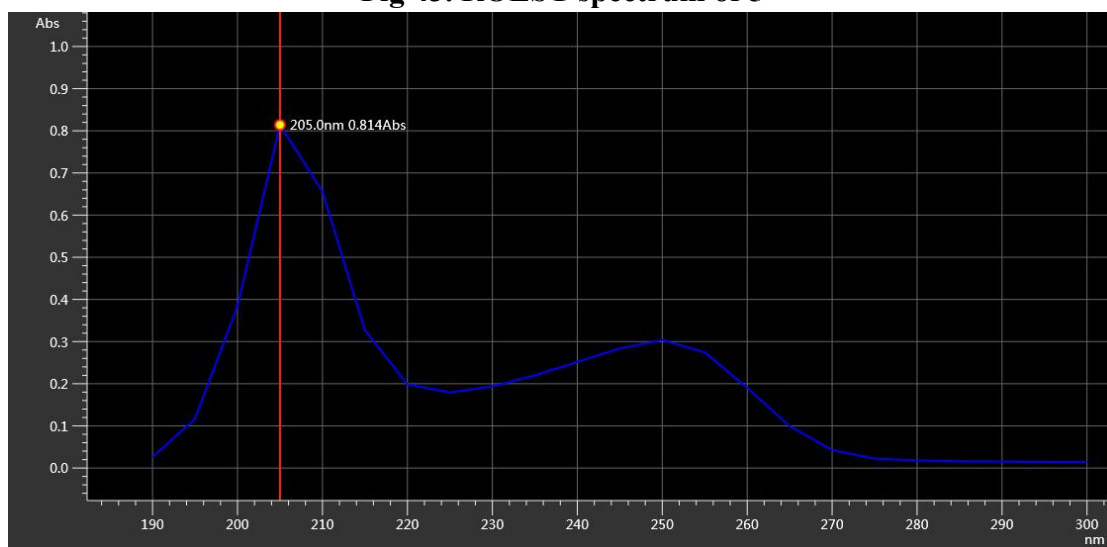

**Fig 44. UV spectrum of 5**

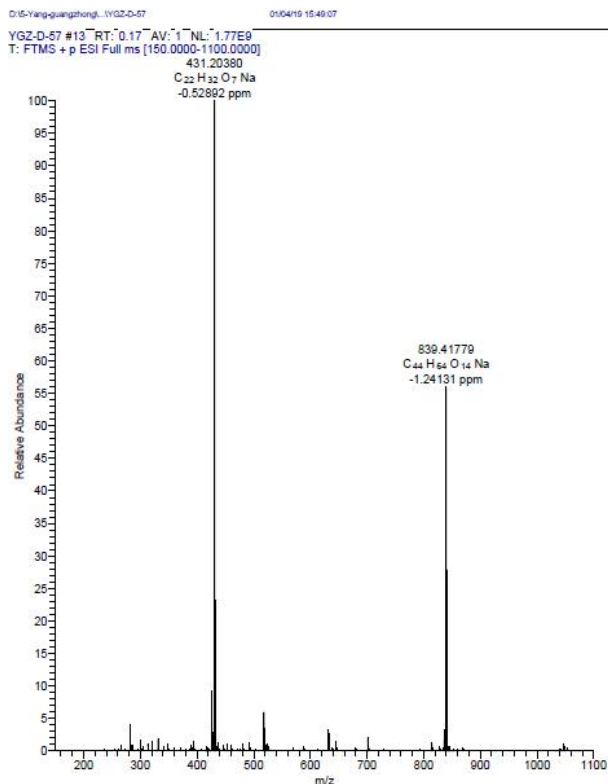

Fig 45. HR-ESI-MS of 5

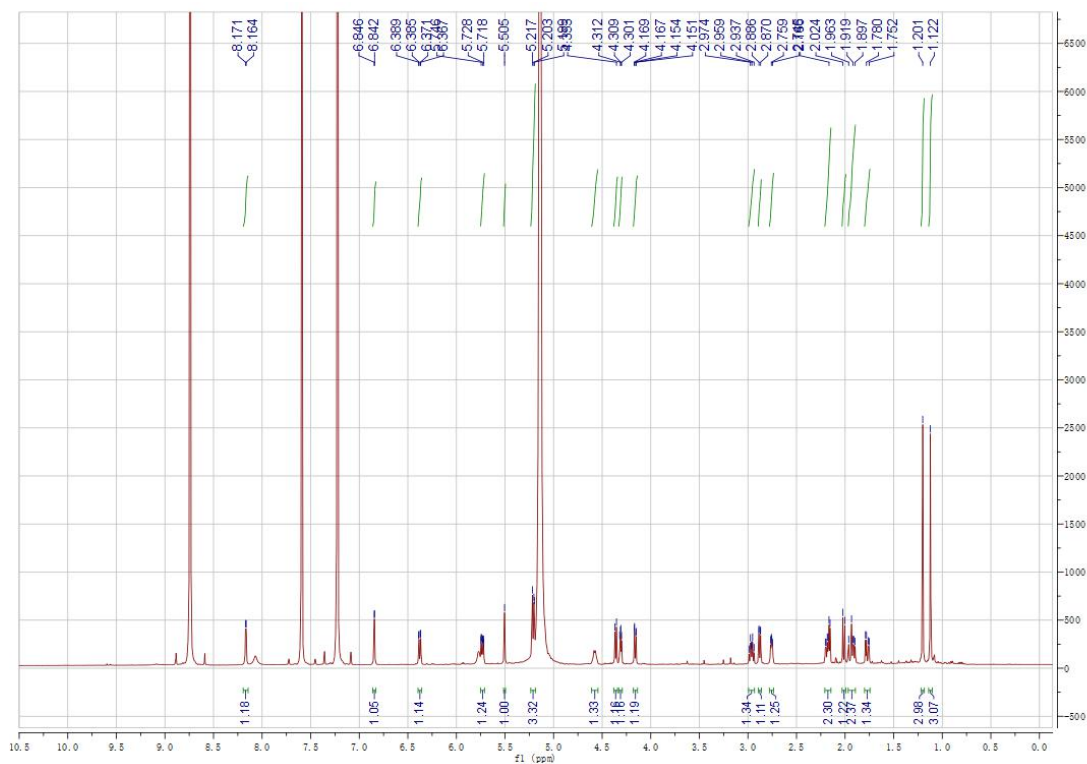

Fig 46. The <sup>1</sup>H-NMR spectrum of 6



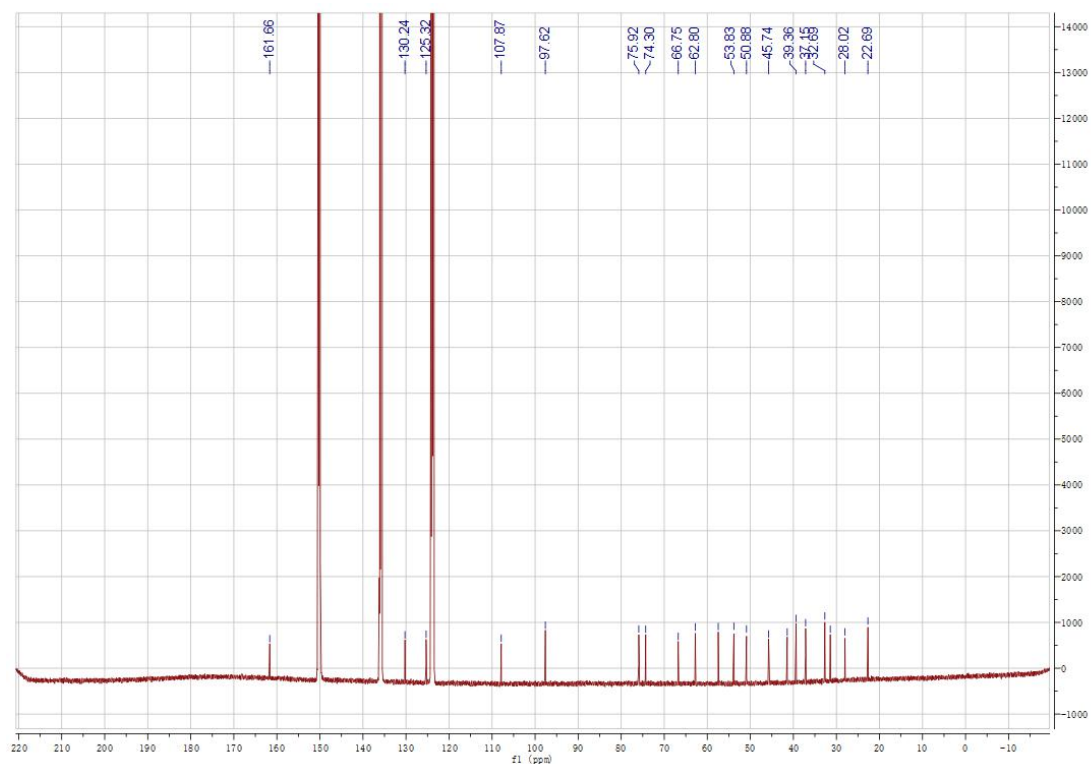

**Fig 47. The  $^{13}\text{C}$ -NMR spectrum of 6**

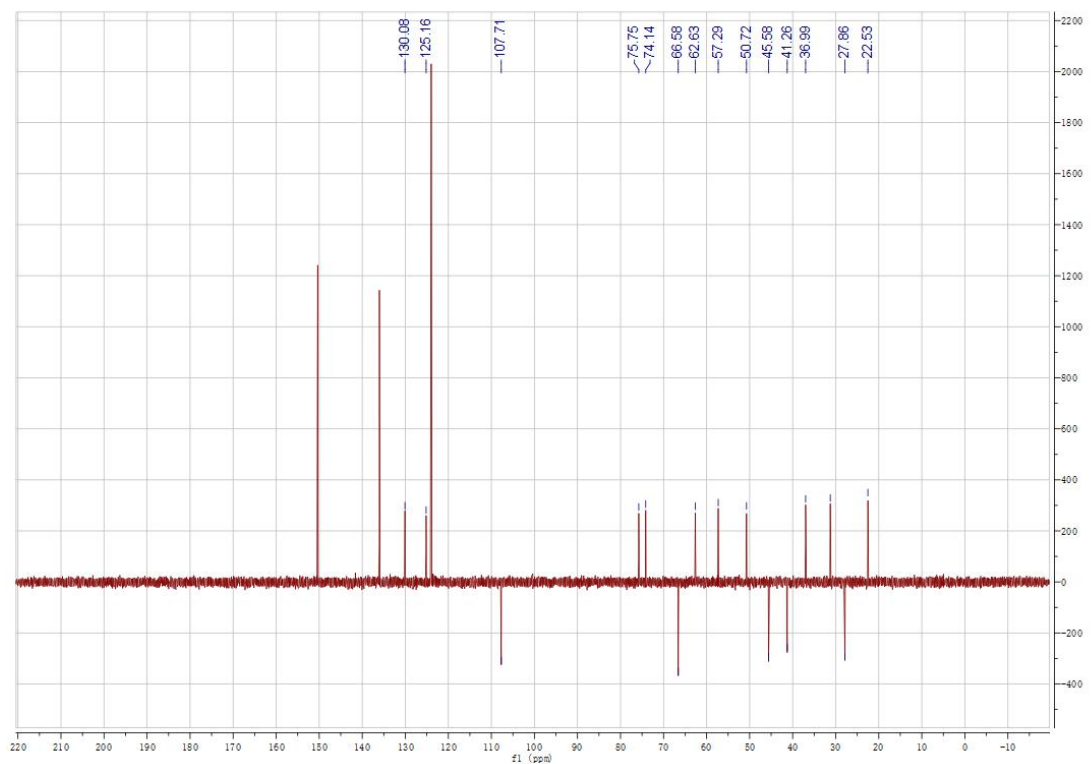

**Fig 48.  $^{13}\text{C}$ -NMR-DEPT spectrum of 6**

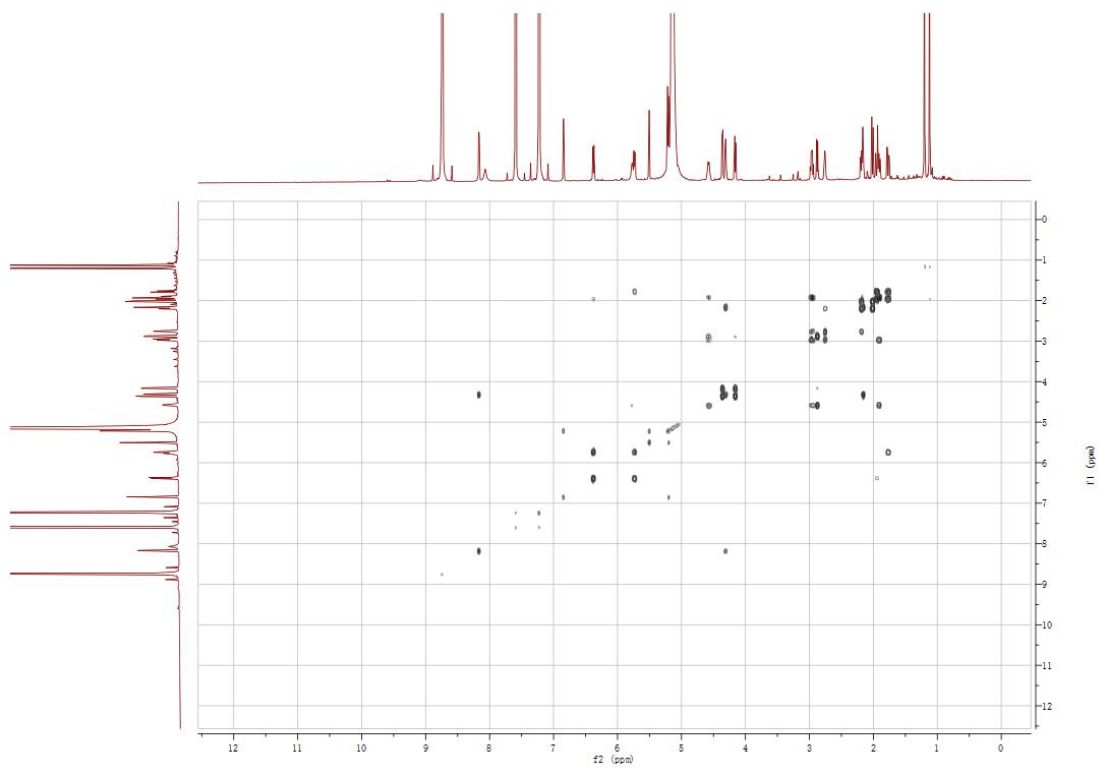

**Fig 49.  $^1\text{H}$ - $^1\text{H}$  COSY spectrum of 6**

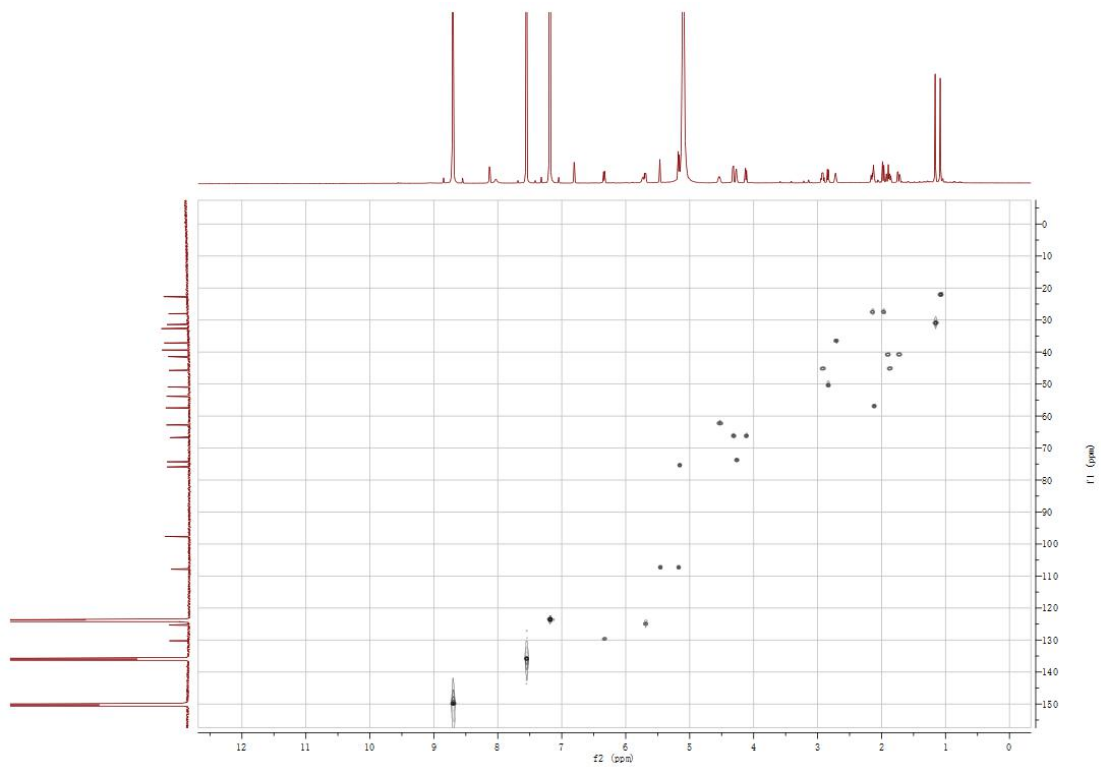

**Fig 50. HSQC spectrum of 6**

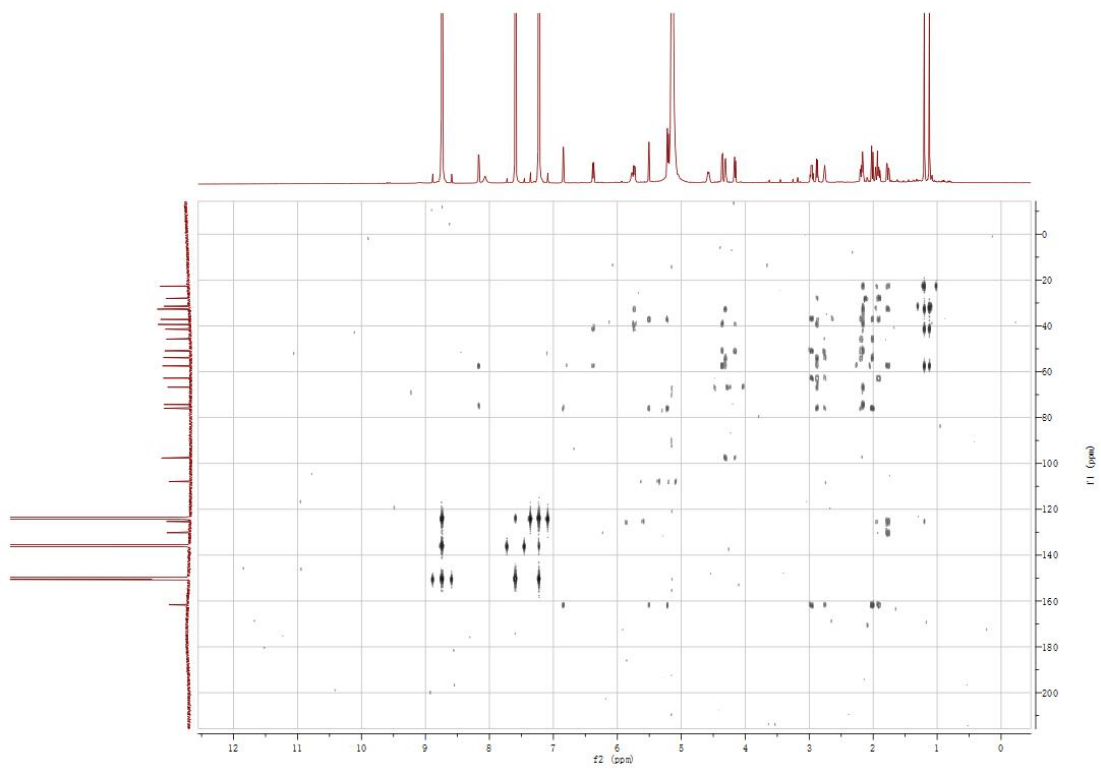

**Fig 51. HMBC spectrum of 6**

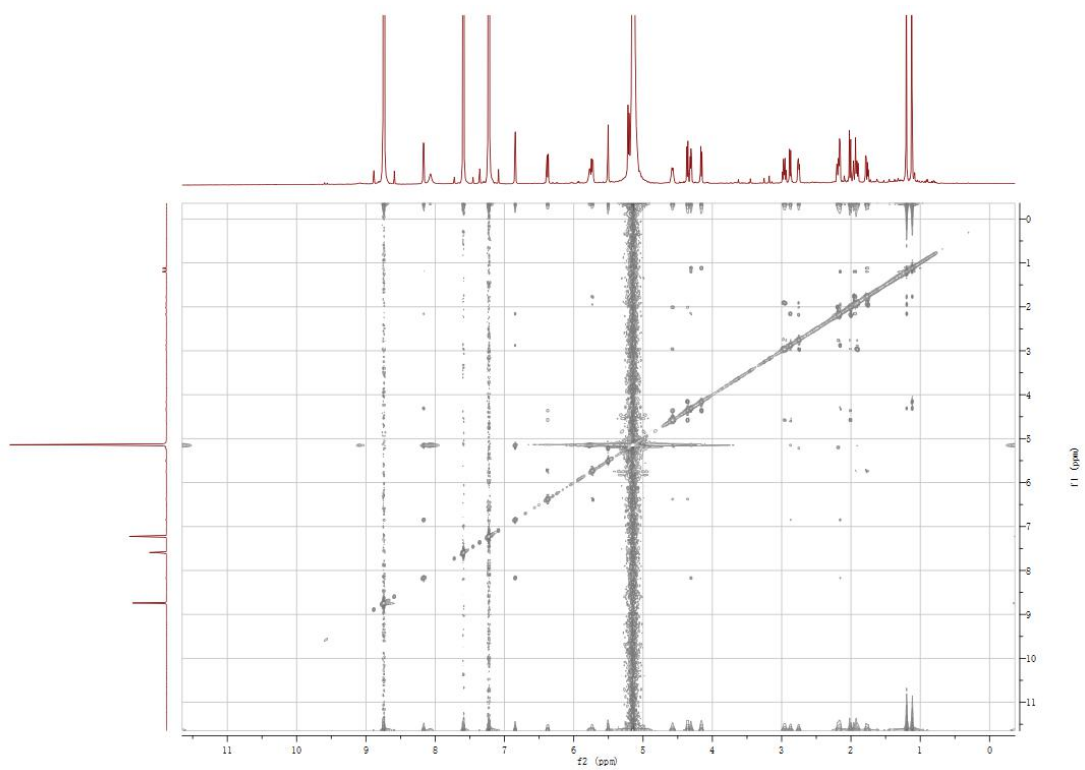

**Fig 52. ROESY spectrum of 6**

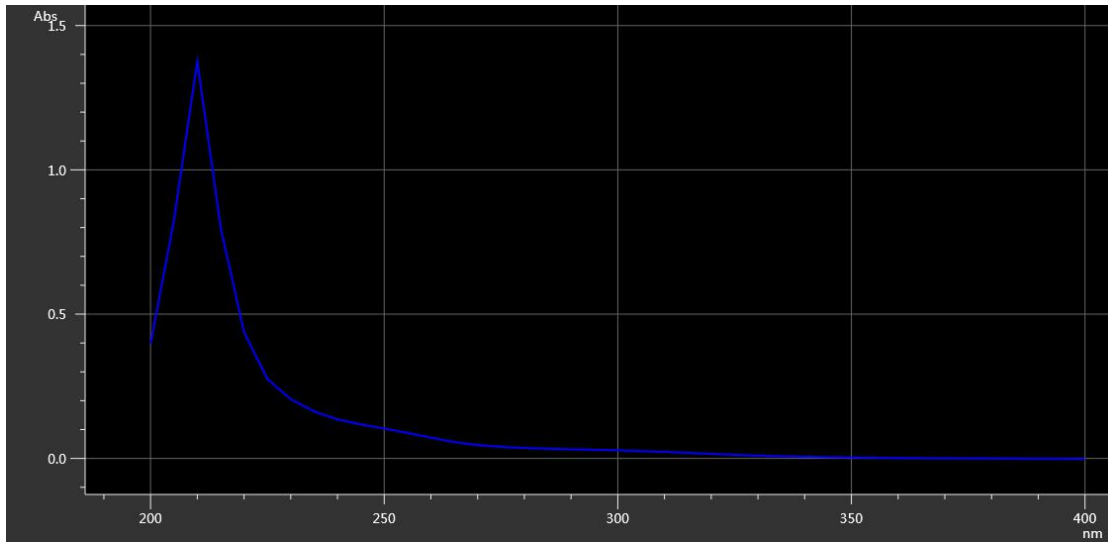

**Fig 53. UV spectrum of 6**

D:\5-Yang-guangzhong\...YGGZ-D-35

07/12/18 12:49:13

YGGZ-D-35 #13 RT: 0.17 AV: 1 NL: 1.38E6

T: FTMS + p ESI Full ms [100.0000-1100.0000]

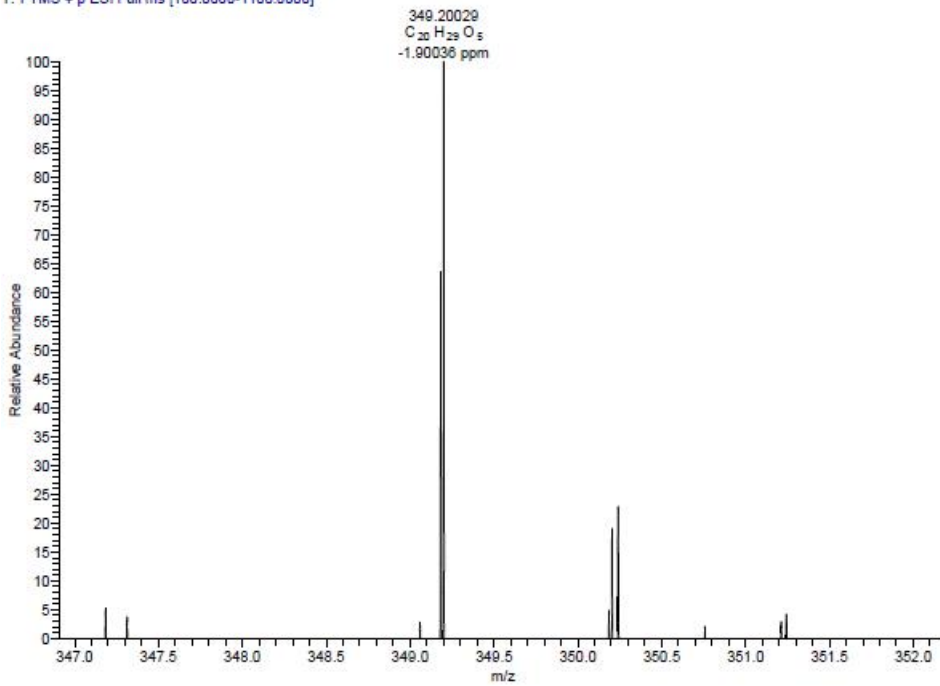

**Fig 54. HR-ESI-MS of 6**
